# Supplementary material for: Synthesis, characterization and biological evaluation of N-(2,3-dimethyl-5-oxo-1-phenyl-2,5-dihydro-1H-pyrazol-4-yl)benzamides
Source: Royal Society of Chemistry journal article supplement (doi:10.1039/c5ra17568b), 2015-01-01
Supplement: c5ra17568b1.pdf [file c5ra17568b1.pdf]

## Synthesis, characterization and biological evaluation of *N*-(2,3-dimethyl-5-oxo-1-phenyl-2,5-dihydro-1*H*-pyrazol-4-yl)benzamides

Aamer Saeed<sup>a\*</sup>, Syeda Abida Ejaz<sup>b</sup>, Asma Khurshid<sup>a</sup>, Sidra Hassan<sup>b</sup>, Mariya al-Rashida<sup>c</sup>,  
Muhammad Latif<sup>d</sup>, Joanna Lecka<sup>e,f</sup>, Jean Sévigny<sup>e,f</sup> & Jamshed Iqbal<sup>b\*</sup>

<sup>a</sup> Department of Chemistry, Quaid-I-Azam University, 45320, Islamabad, Pakistan

<sup>b</sup> Centre for Advanced Drug Research, COMSATS Institute of Information Technology, Abbottabad 22060, Pakistan

<sup>c</sup> Department of Chemistry, Forman Christian College (A Chartered University), Ferozpur Road-54600, Lahore, Pakistan

<sup>d</sup> Medicinal/Pharmaceutical Chemistry Laboratory, Korea Research Institute of Chemical Technology 141-Gajeongro, Yuseong, Daejeon 305-600, South Korea.

<sup>e</sup> Département de microbiologie-infectiologie et d'immunologie, Faculté de Médecine, Université Laval, Québec, QC, Canada

<sup>f</sup> Centre de Recherche du CHU de Québec – Université Laval, Québec, QC, Canada

### SUPPORTING INFORMATION

| List of Figures                                                                                                                                                                                                                      | Pg # |
|--------------------------------------------------------------------------------------------------------------------------------------------------------------------------------------------------------------------------------------|------|
| Spectral data, LCMS, GCMS                                                                                                                                                                                                            | 2-33 |
| Figure S1. Ramachandran Plot of re5NT.                                                                                                                                                                                               | 34   |
| Figure S2. Ramachandran Plot of hTNALP.                                                                                                                                                                                              | 35   |
| Figure S3. Ramachandran Plot of hIALP.                                                                                                                                                                                               | 36   |
| Figure S4. Ramachandran Plot of hGCALP.                                                                                                                                                                                              | 37   |
| Figure S5. Sequence alignment of target rat ecto-5'-Nucleotidase (re5NT) with the template protein human ecto-5'-Nucleotidase (he5NT).                                                                                               | 38   |
| Figure S6. Sequence alignment of target human tissue non-specific alkaline phosphatase (hTNAP) with the template protein human placental alkaline phosphatase (hPALP).                                                               | 39   |
| Figure S7. Sequence alignment of target human intestinal alkaline phosphatase (hIALP) with the template protein human placental alkaline phosphatase (hPALP).                                                                        | 40   |
| Figure S8. Sequence alignment of target human germ cell alkaline phosphatase (hGCALP) with the template protein human placental alkaline phosphatase (hPALP).                                                                        | 41   |
| Table S1. Comparison of active site residues of hTNALP, hIALP and hGCALP with hPALP (PDB id: 1ZED). Conserved residues (with respect to hPALP) are in purple font color, the residues which are not conserved are in red font color. | 42   |

**4a -<sup>1</sup>H-NMR a:**

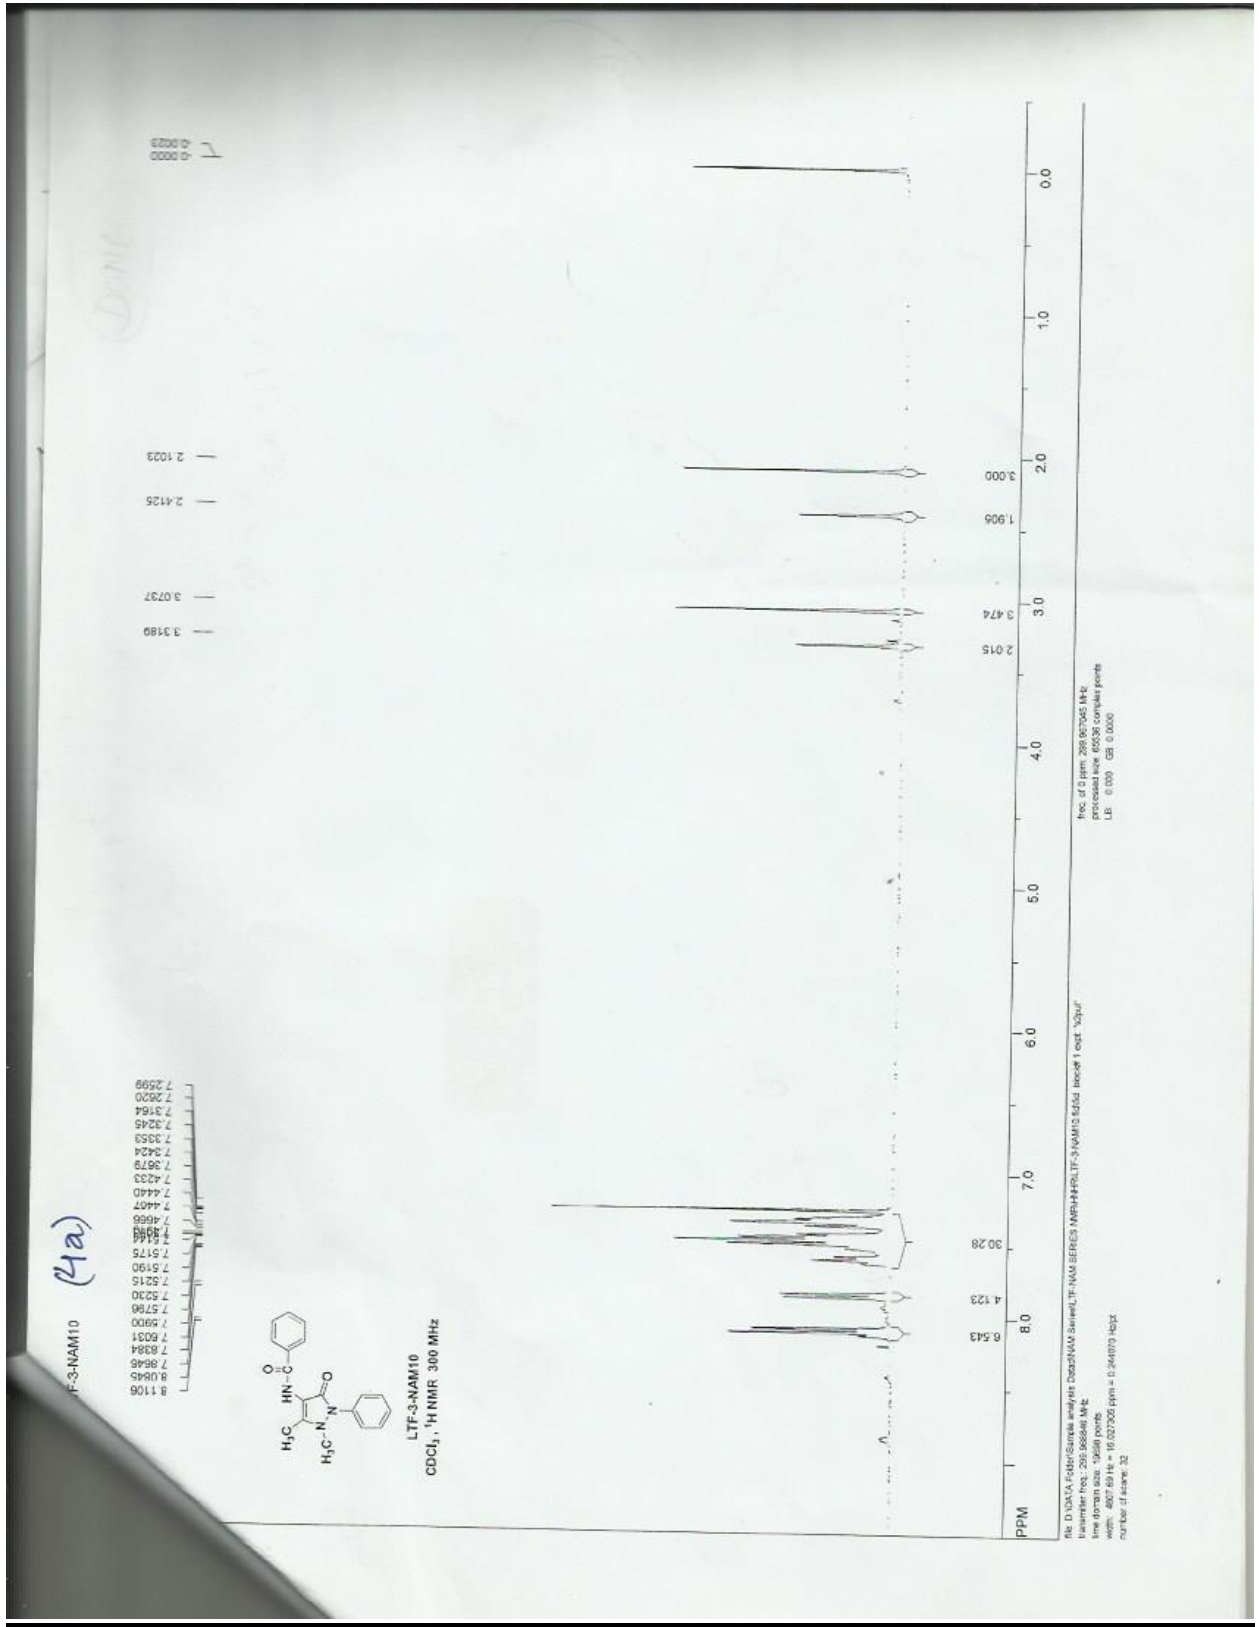

**4a-<sup>13</sup>C-NMR a:**

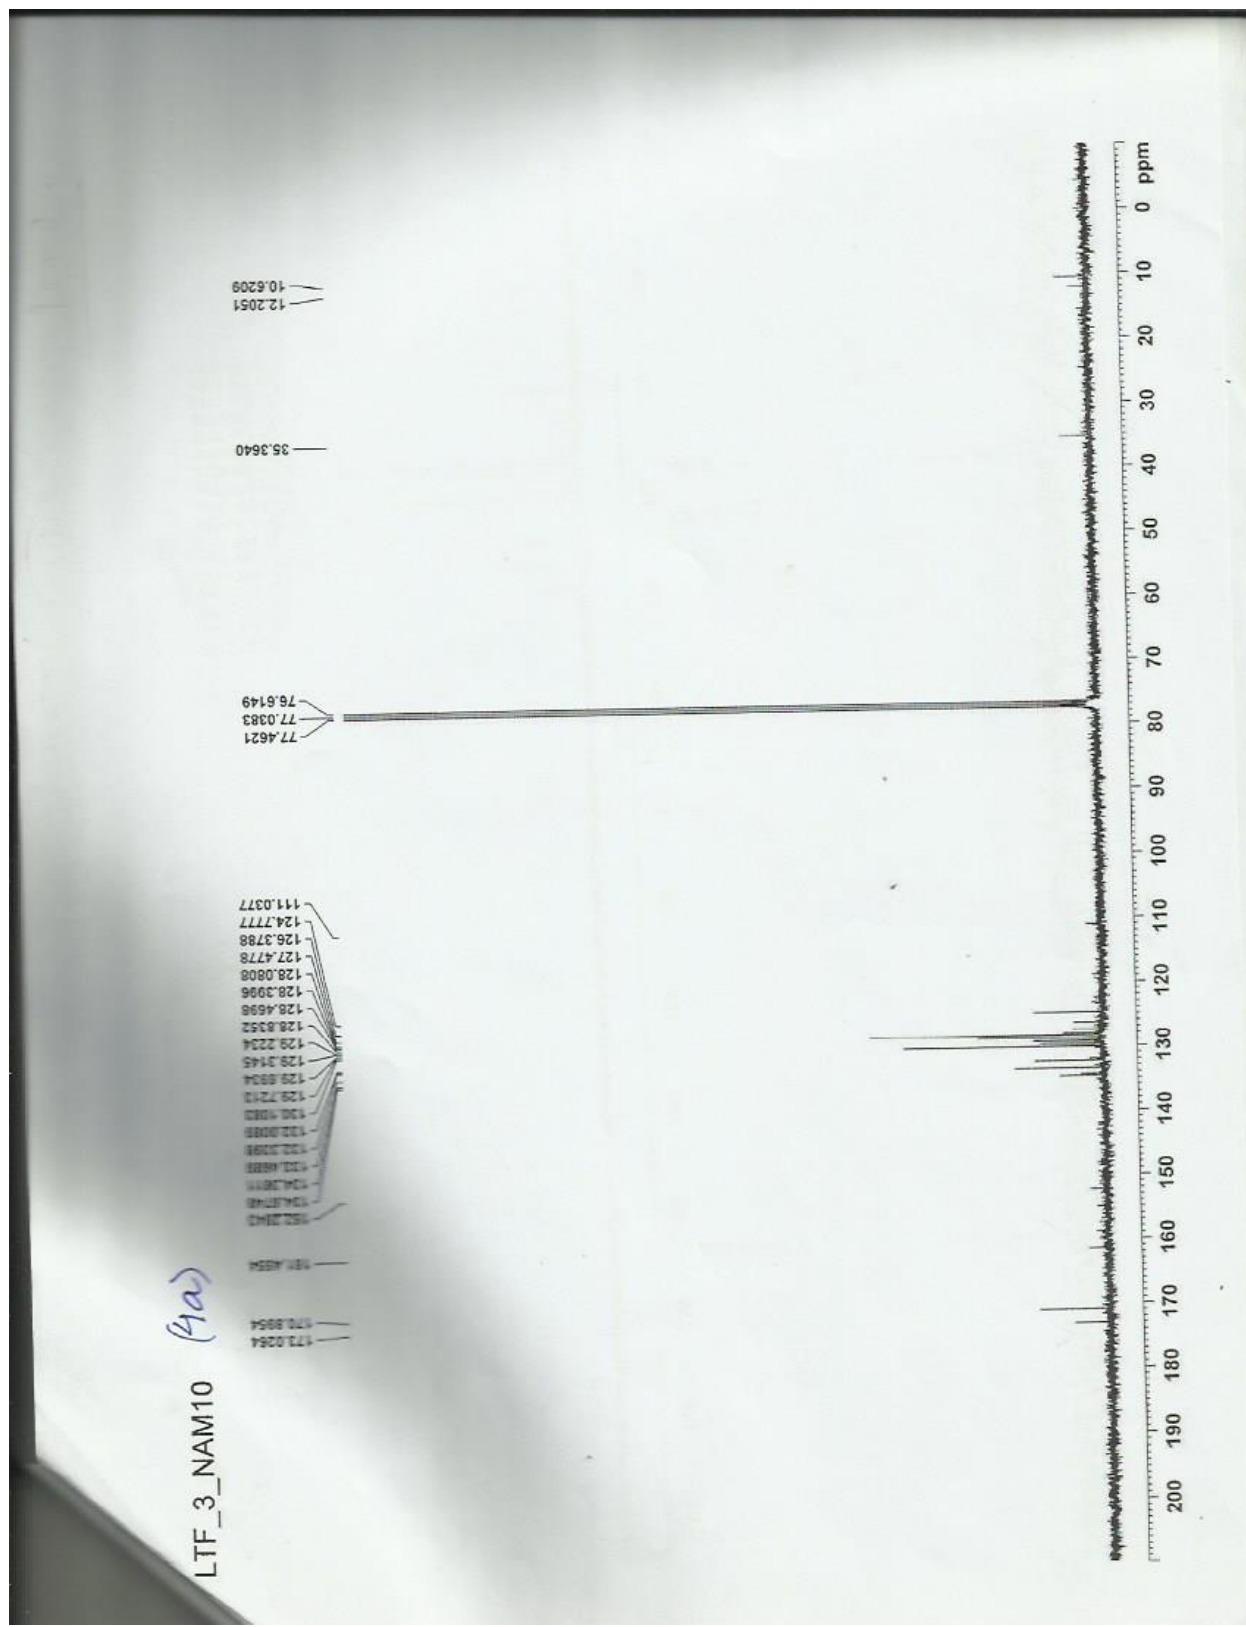

**4a-<sup>13</sup>C-NMR-b:**

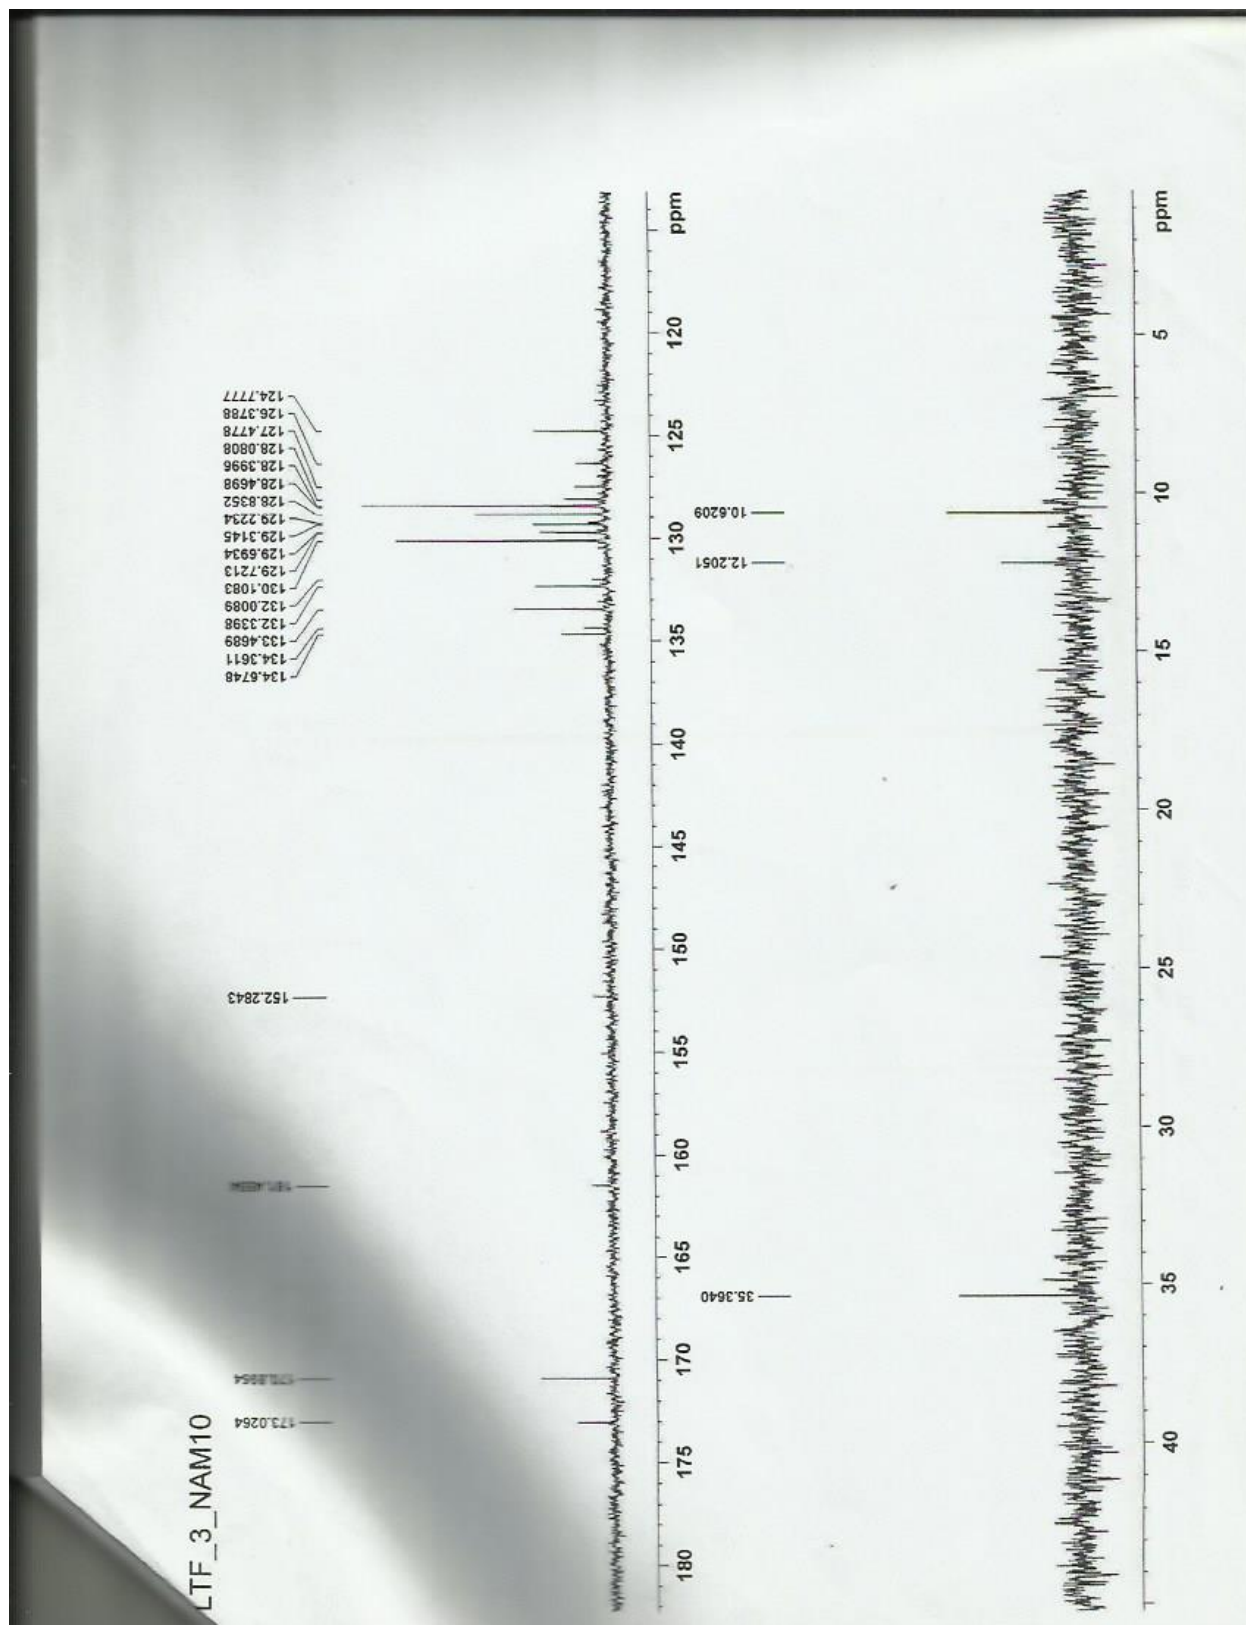

**4b-<sup>1</sup>H-NMR-a:**

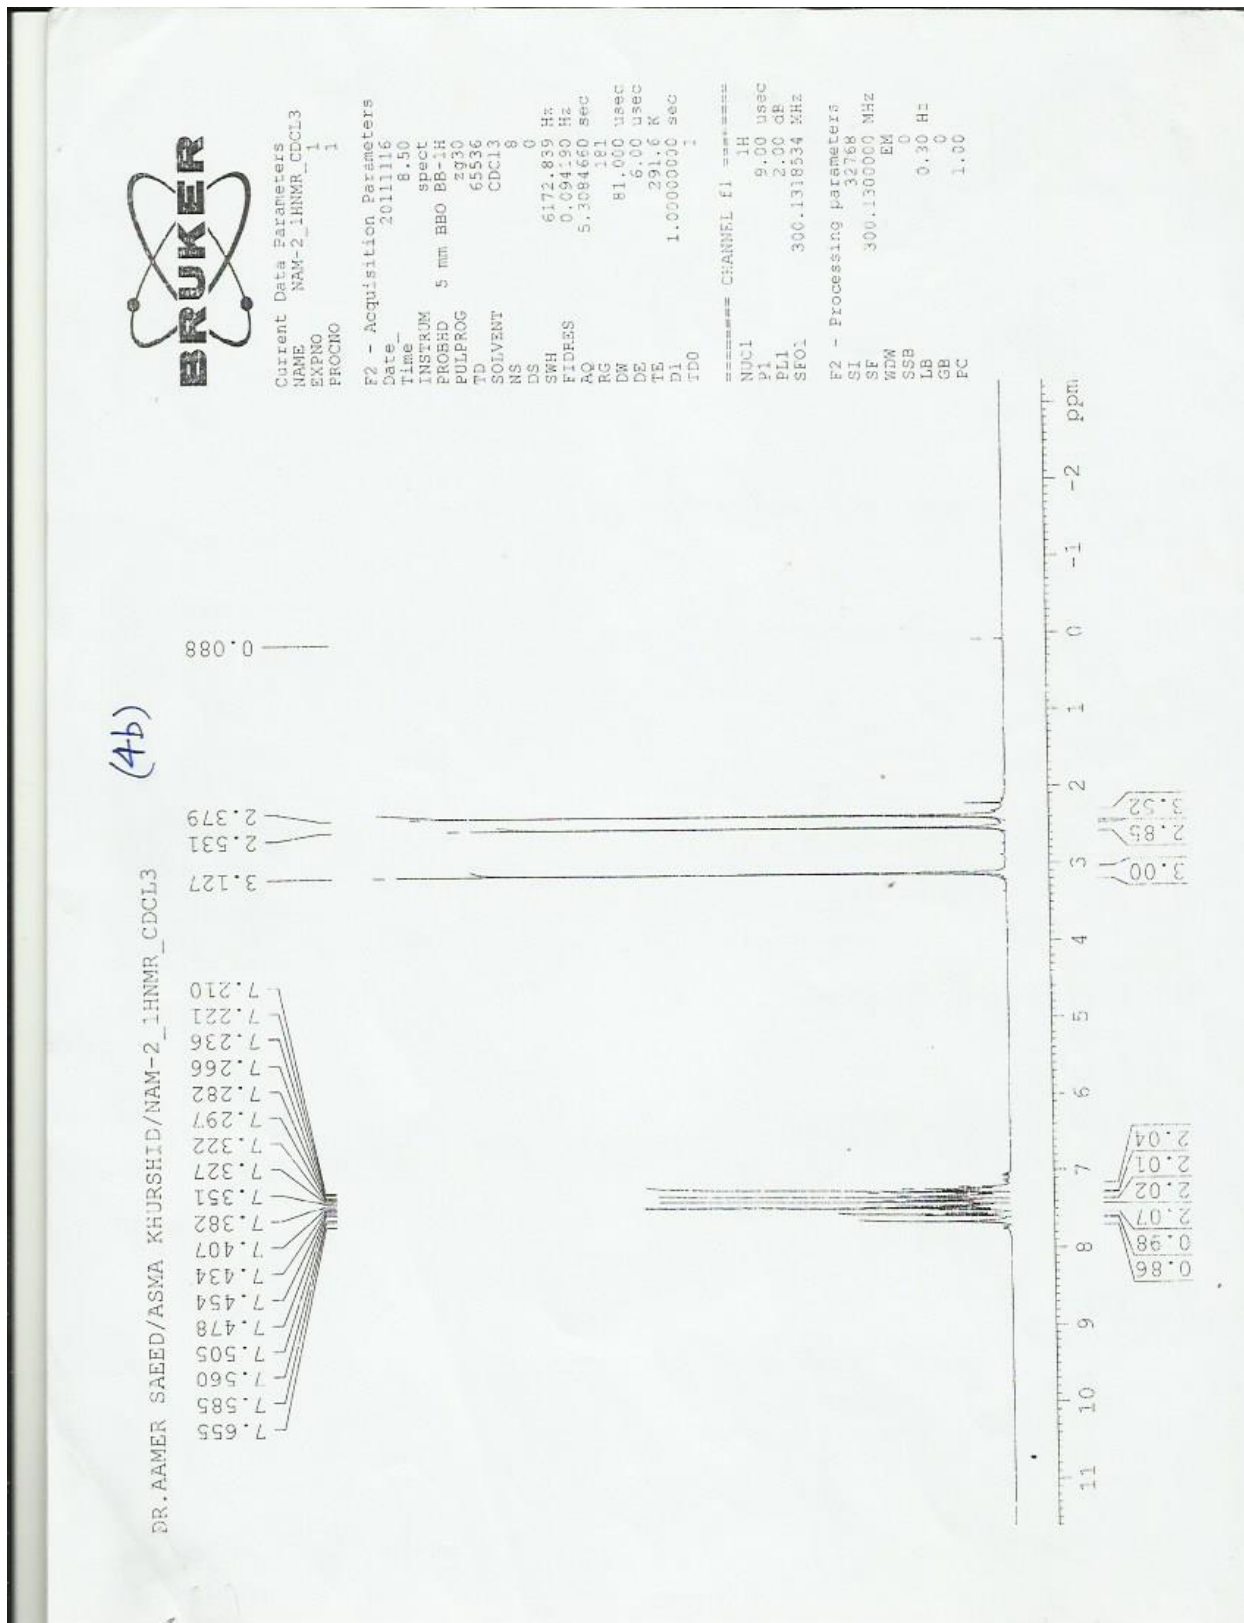

**4b-<sup>1</sup>H-NMR-b:**

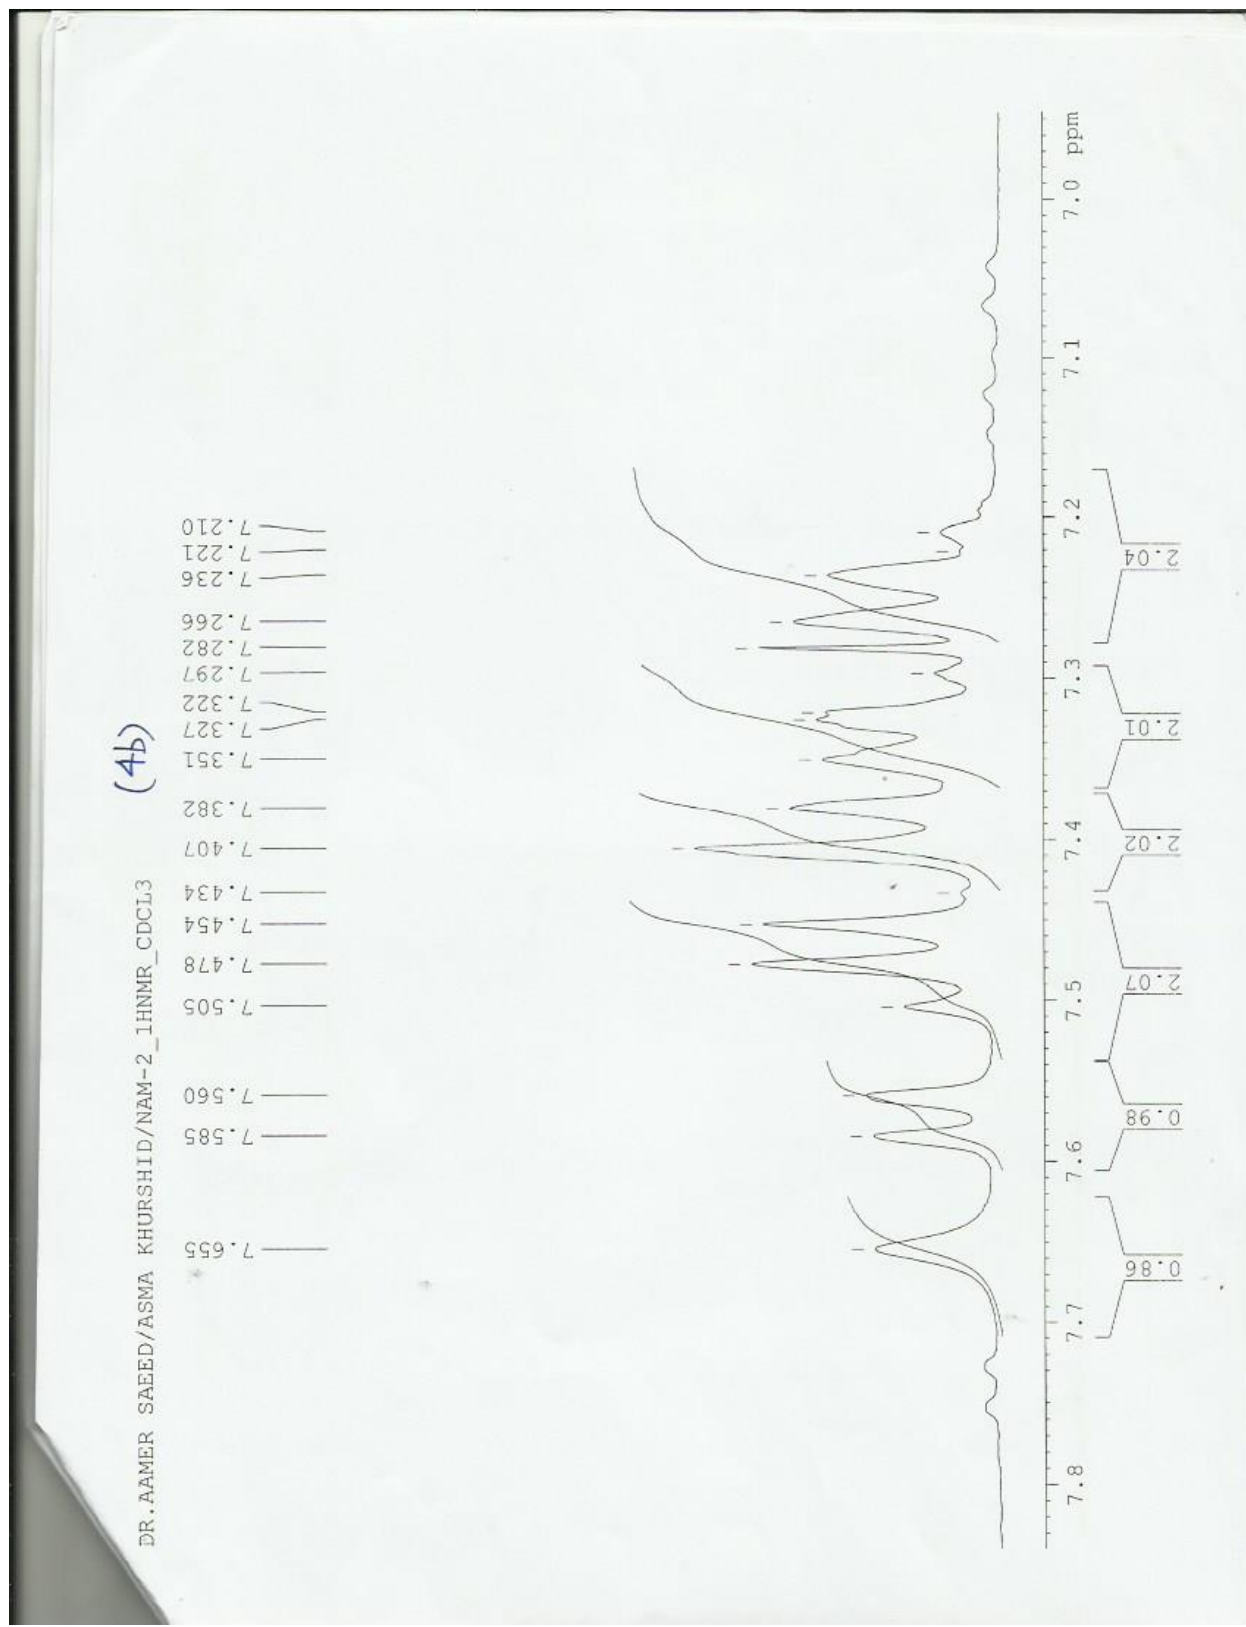



# 4b-<sup>13</sup>C-NMR-a:

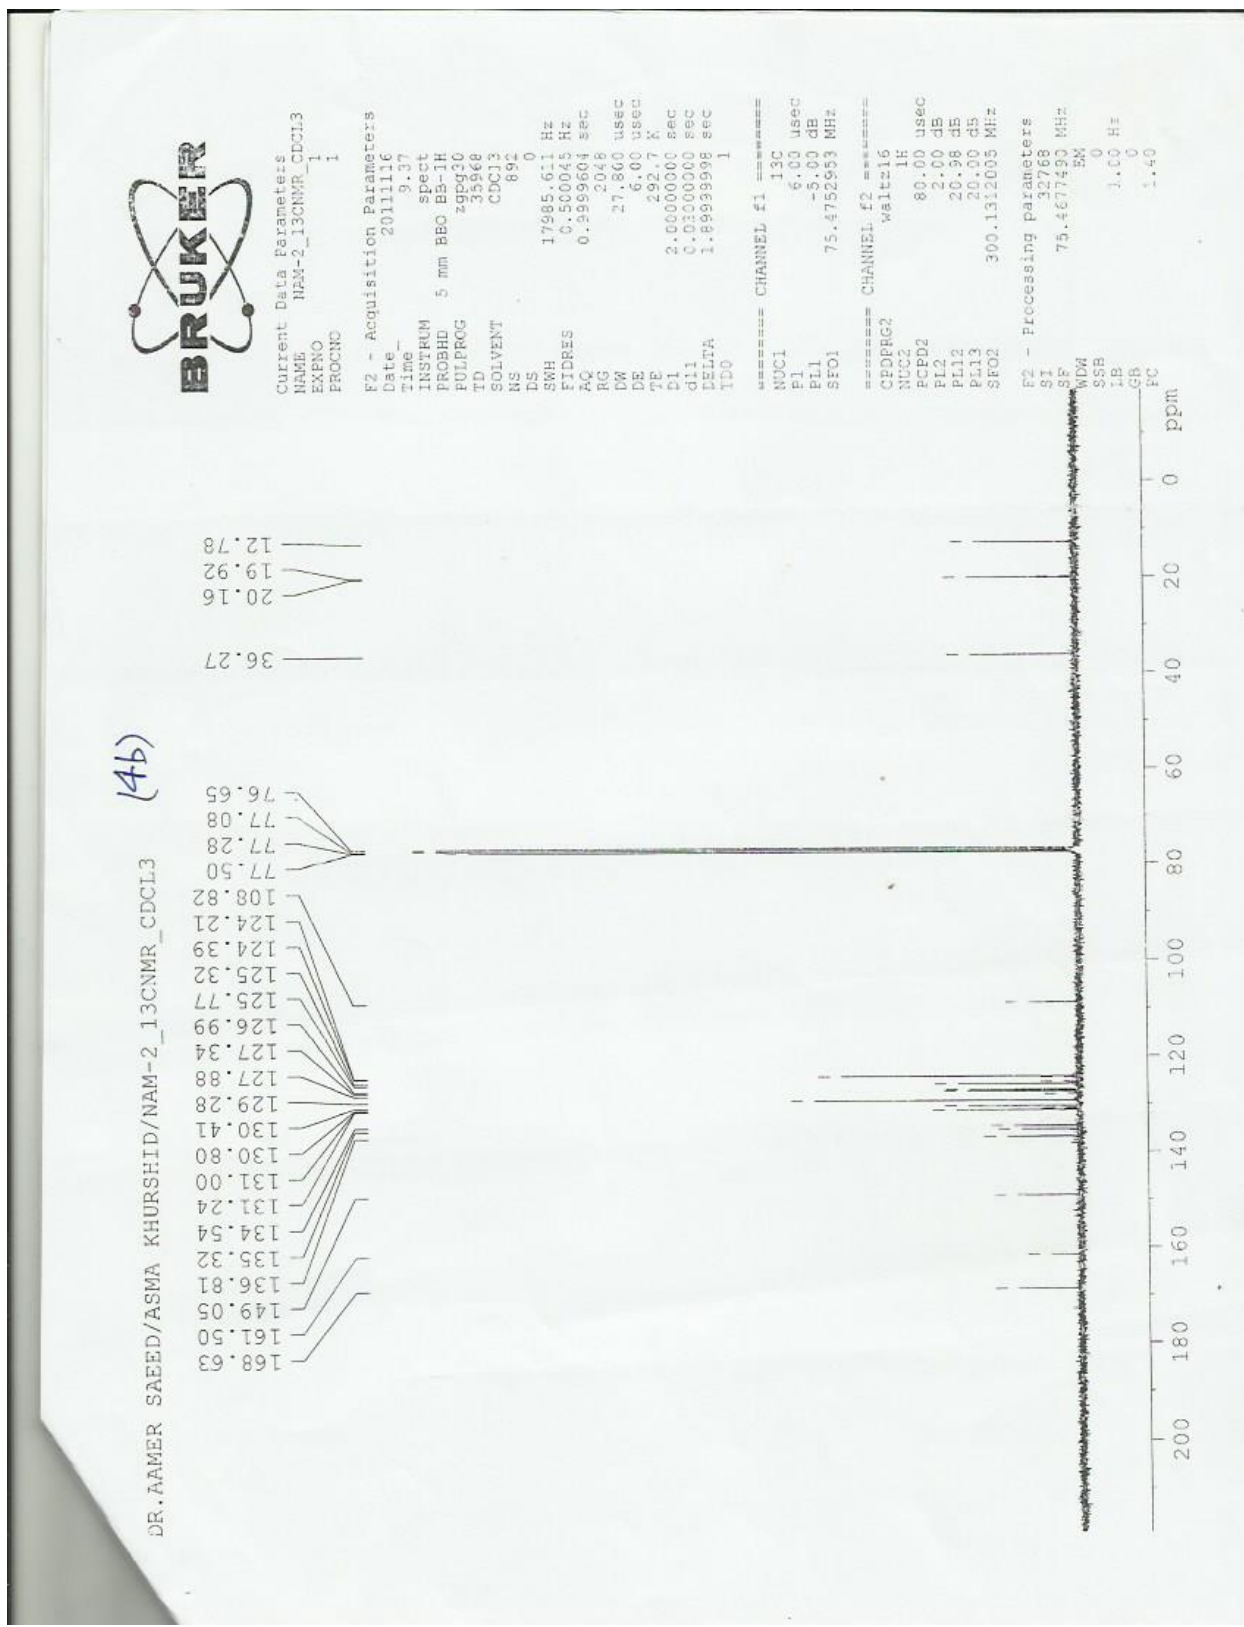

**4b-<sup>13</sup>C-NMR-b:**

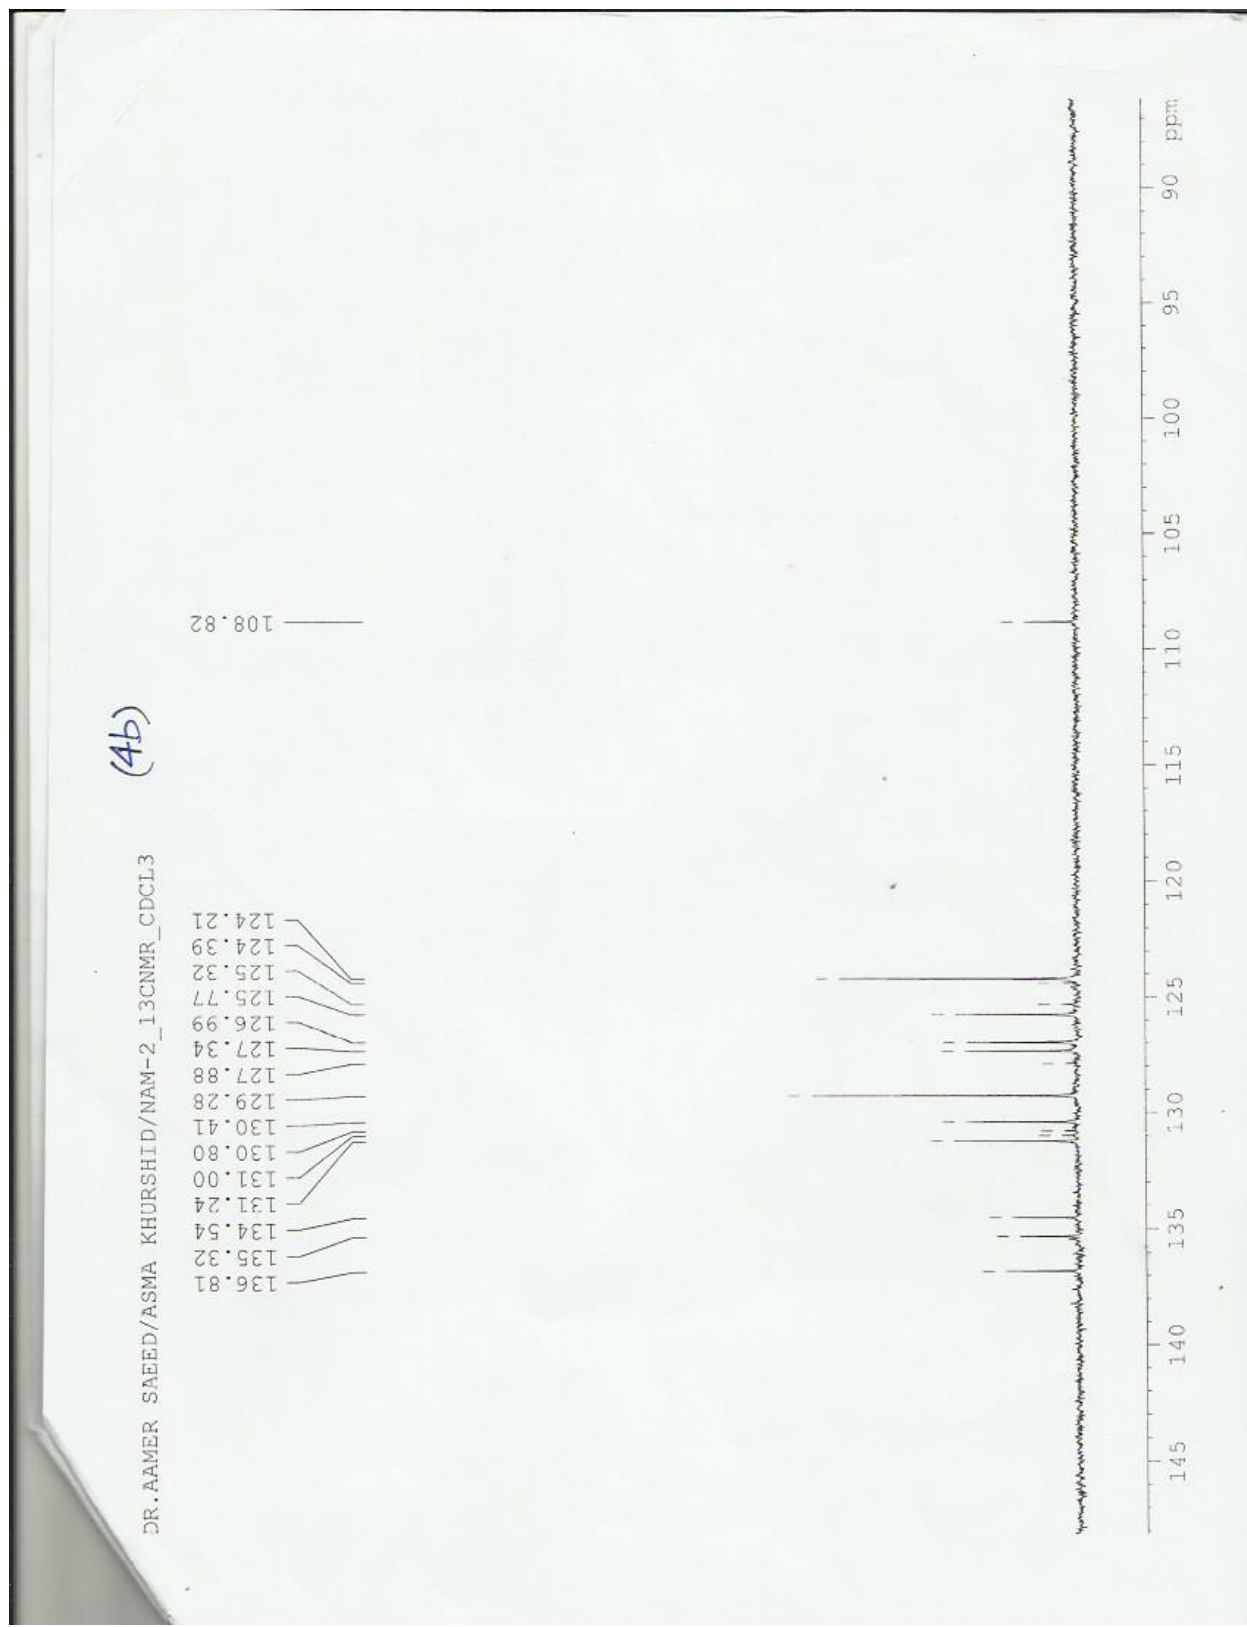





# 4c-<sup>13</sup>C-NMR-a:

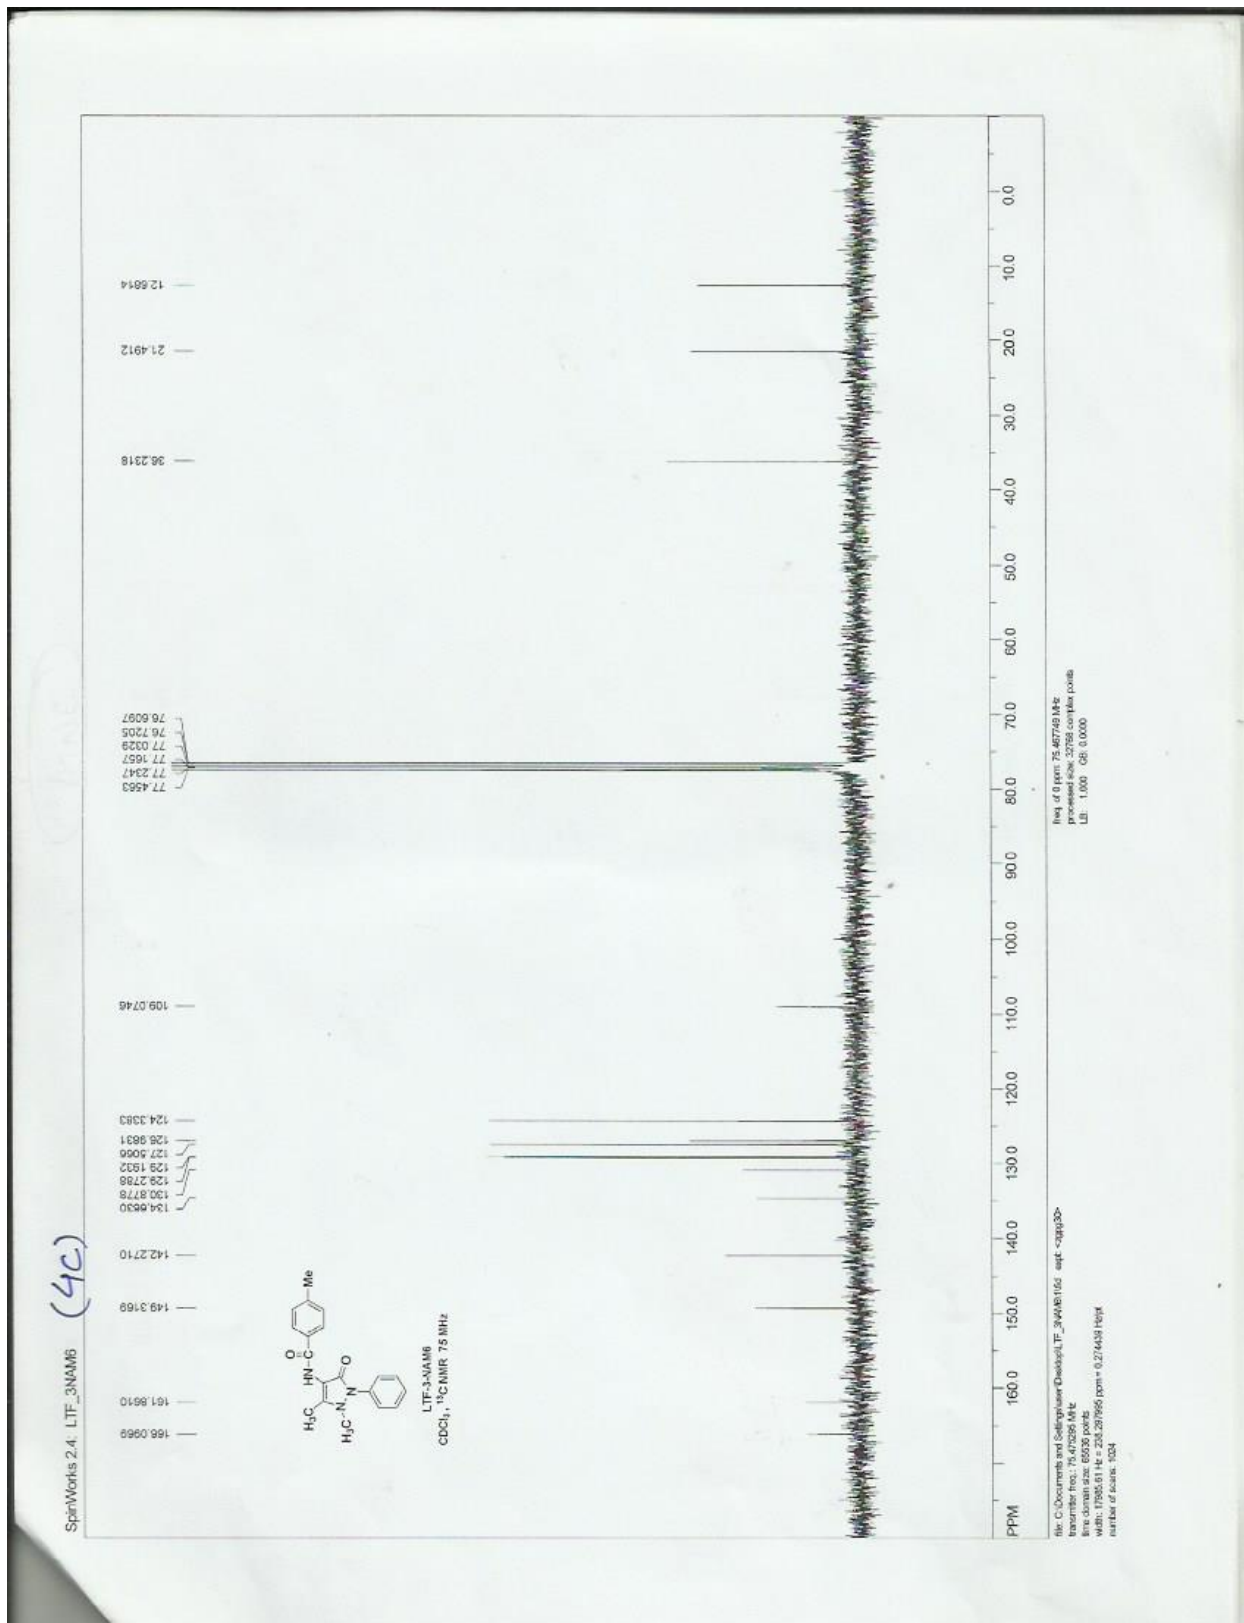

# 4d-<sup>1</sup>H-NMR-a:

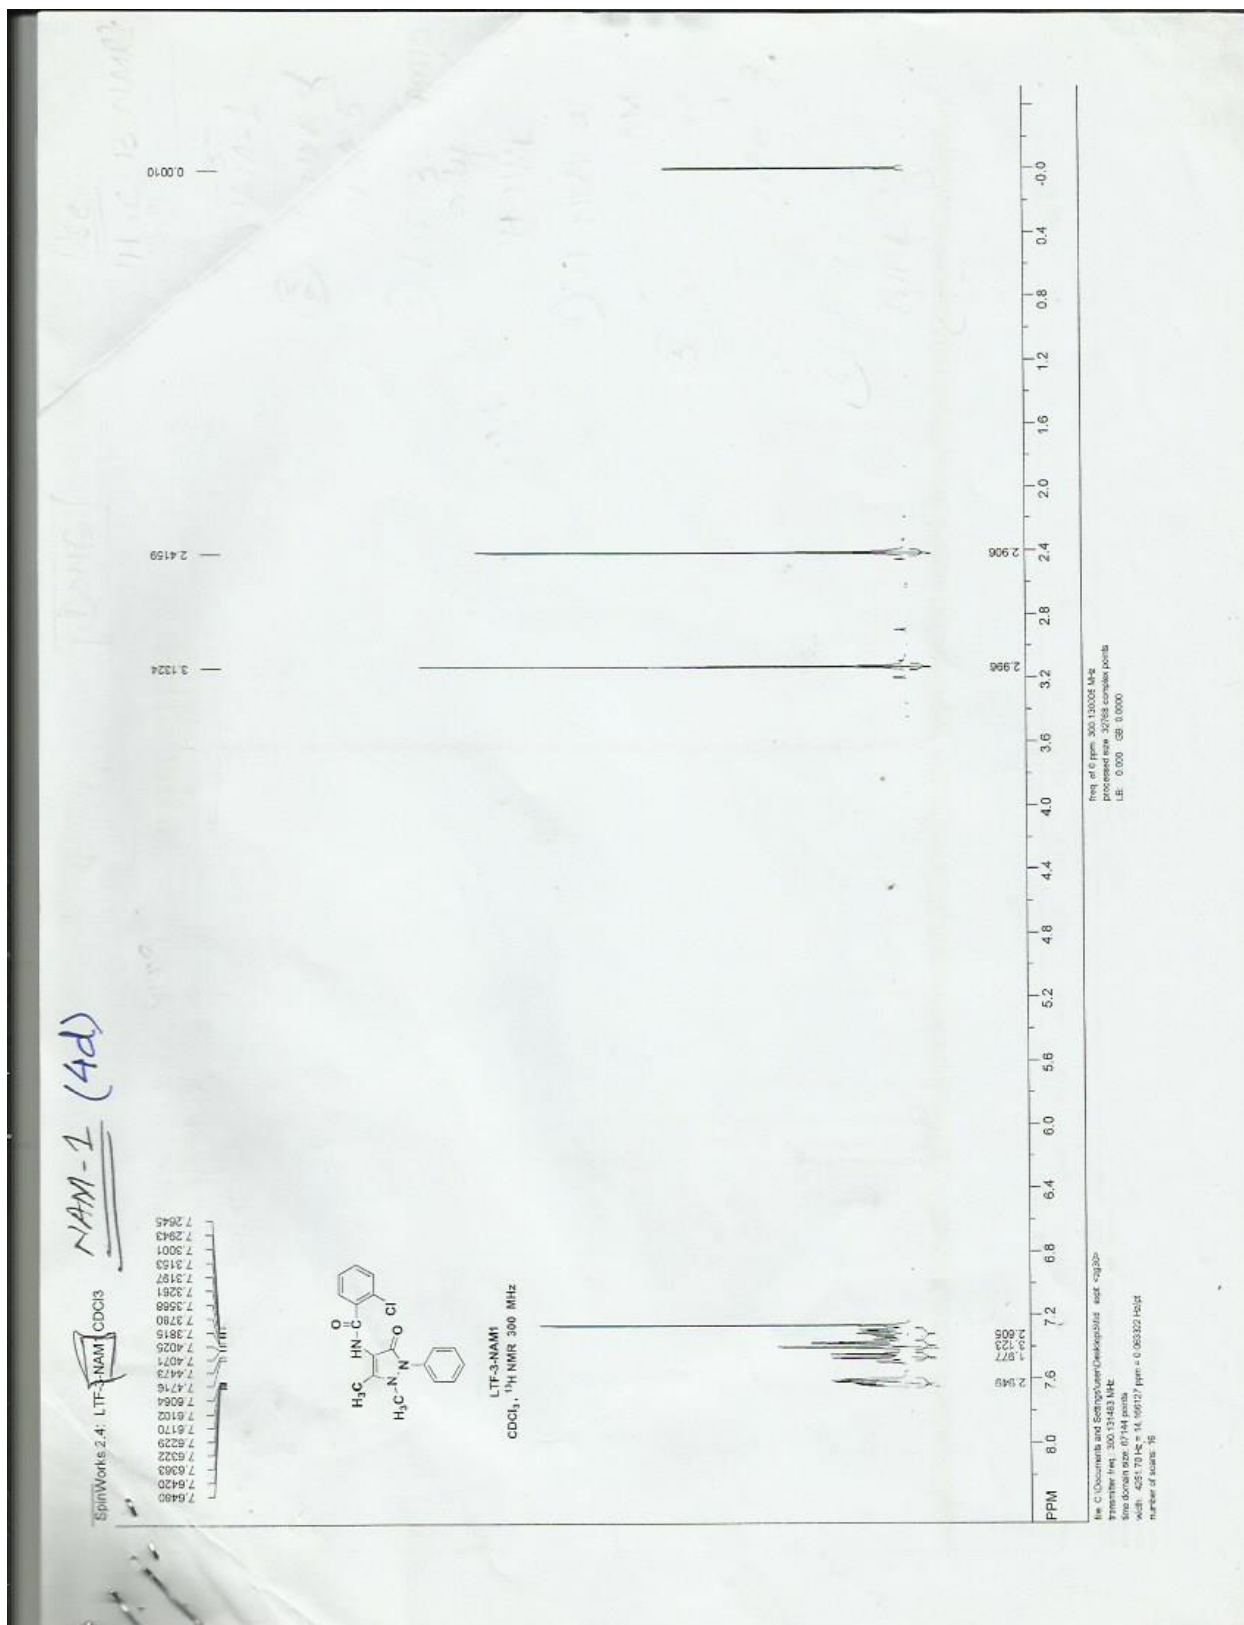

**4d-<sup>13</sup>C-NMRa:**

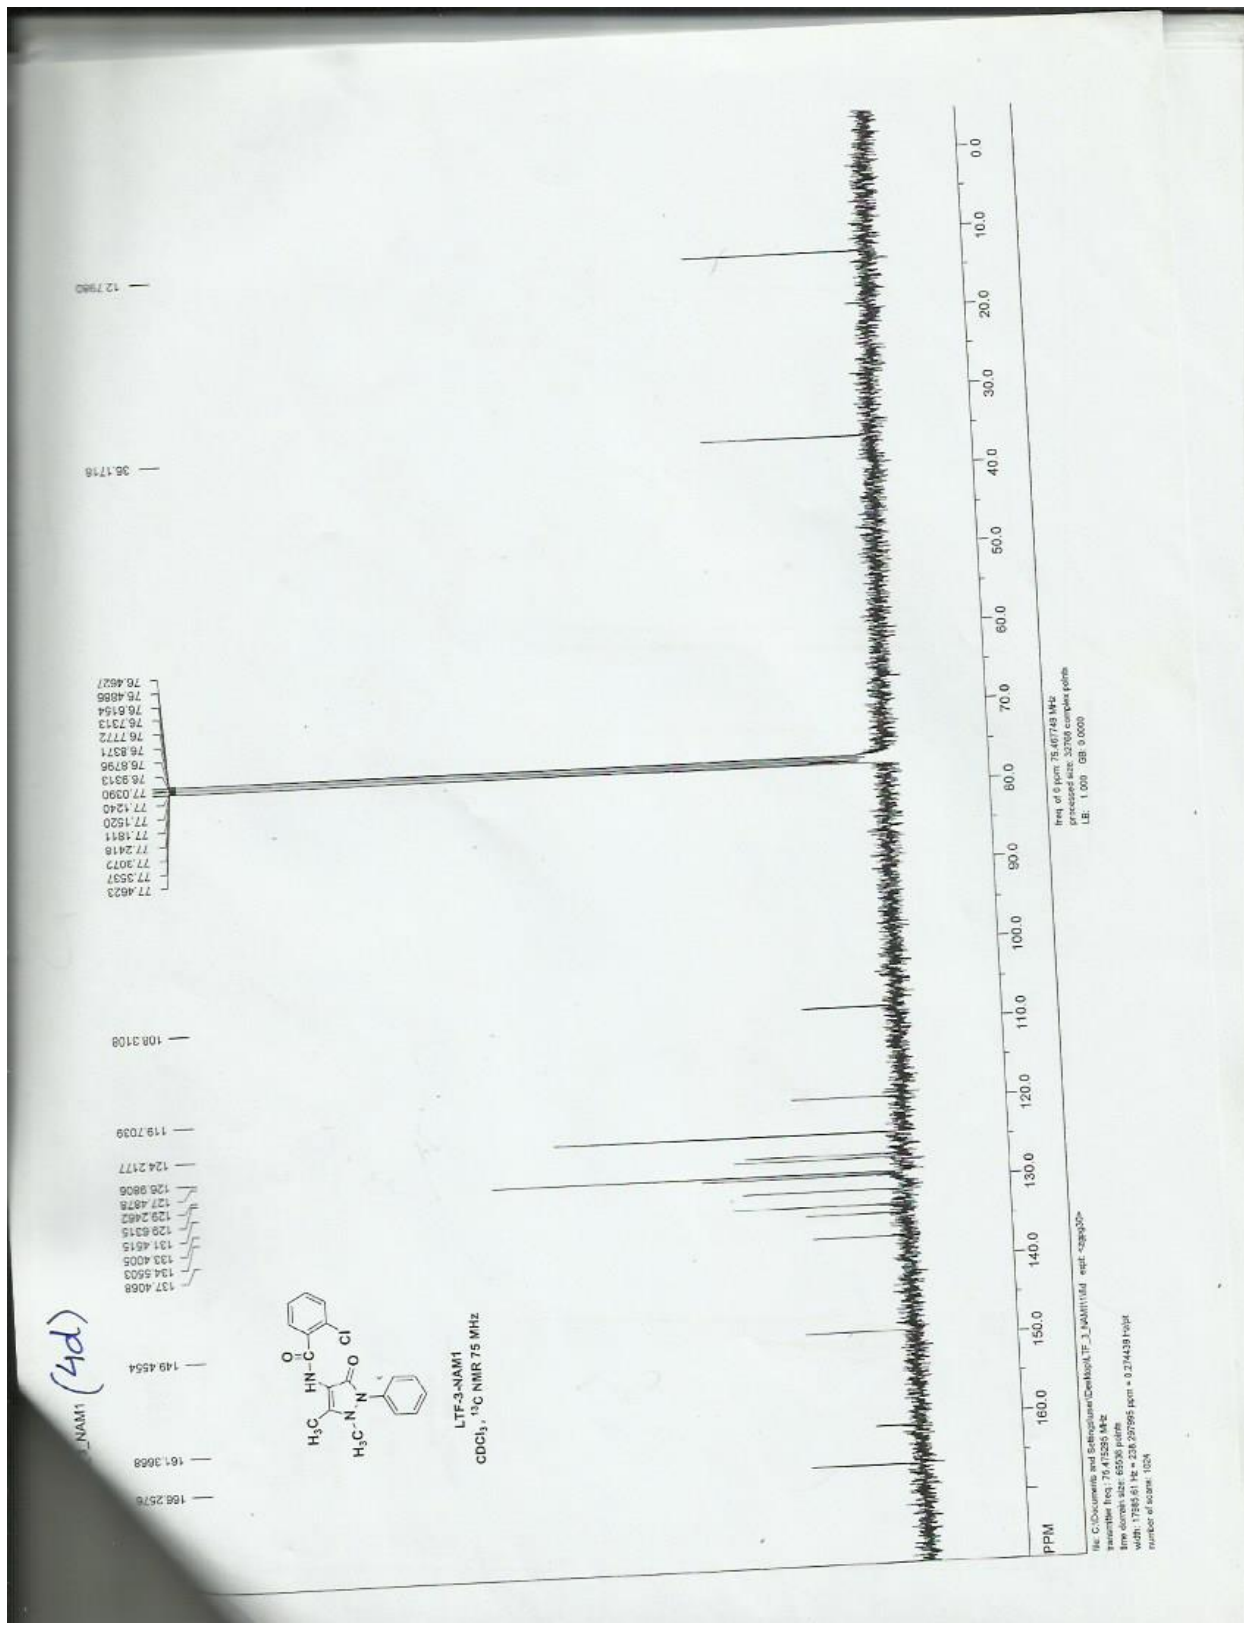

**4e-<sup>1</sup>H-NMR-a:**

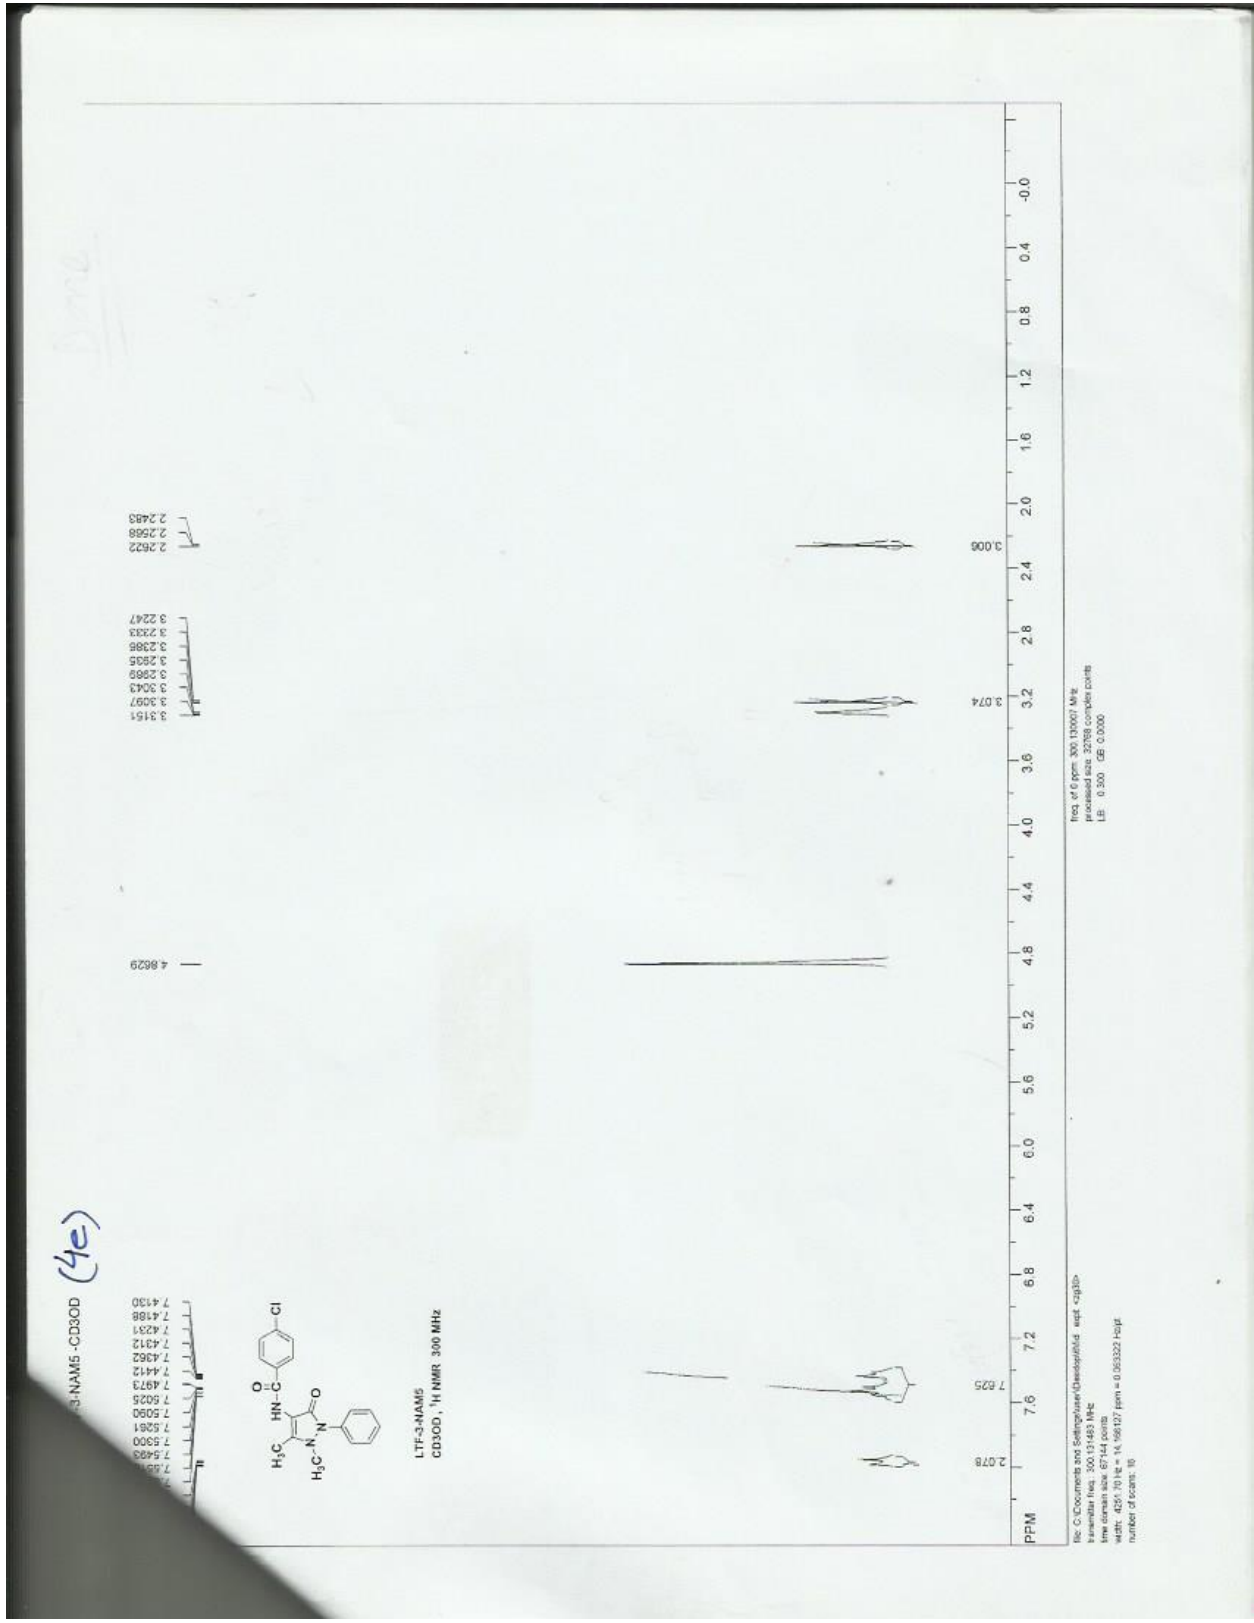

**4e-<sup>13</sup>C-NMR-a:**

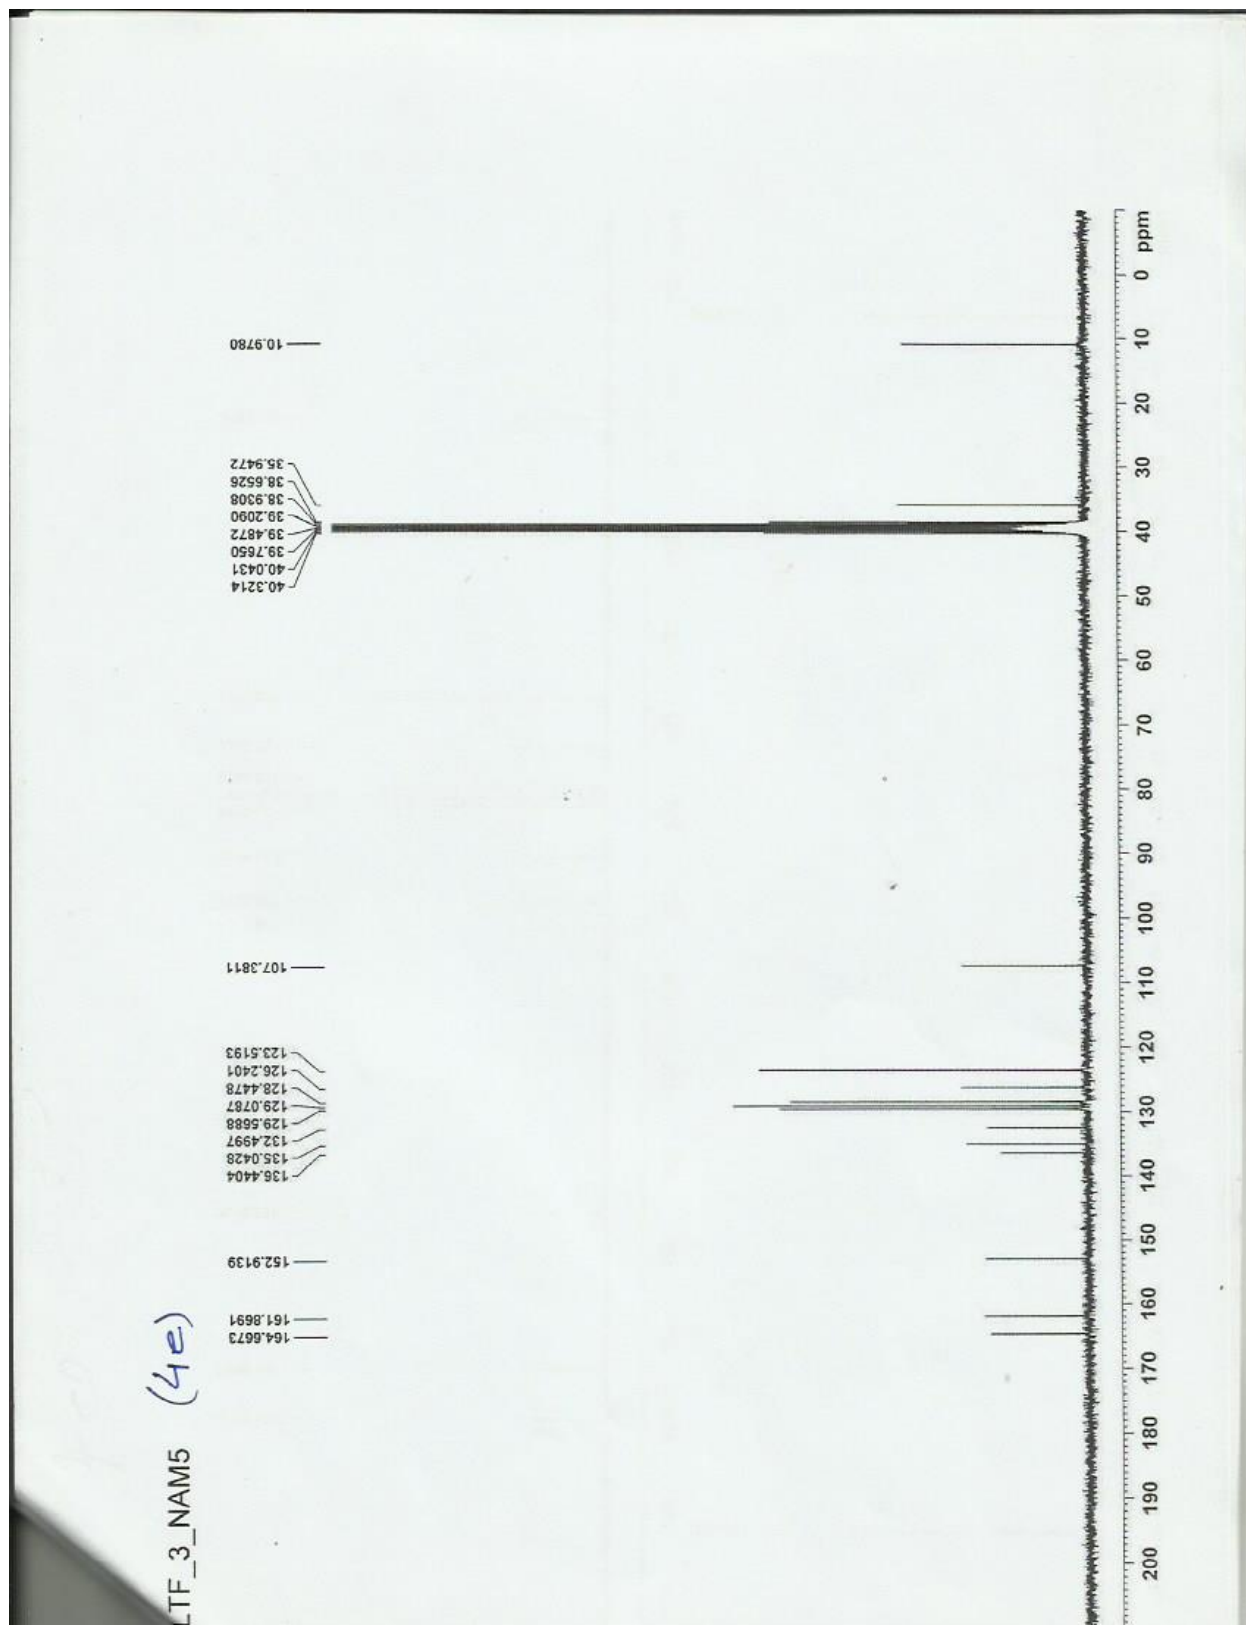



# 4f-<sup>1</sup>H-NMR-a:

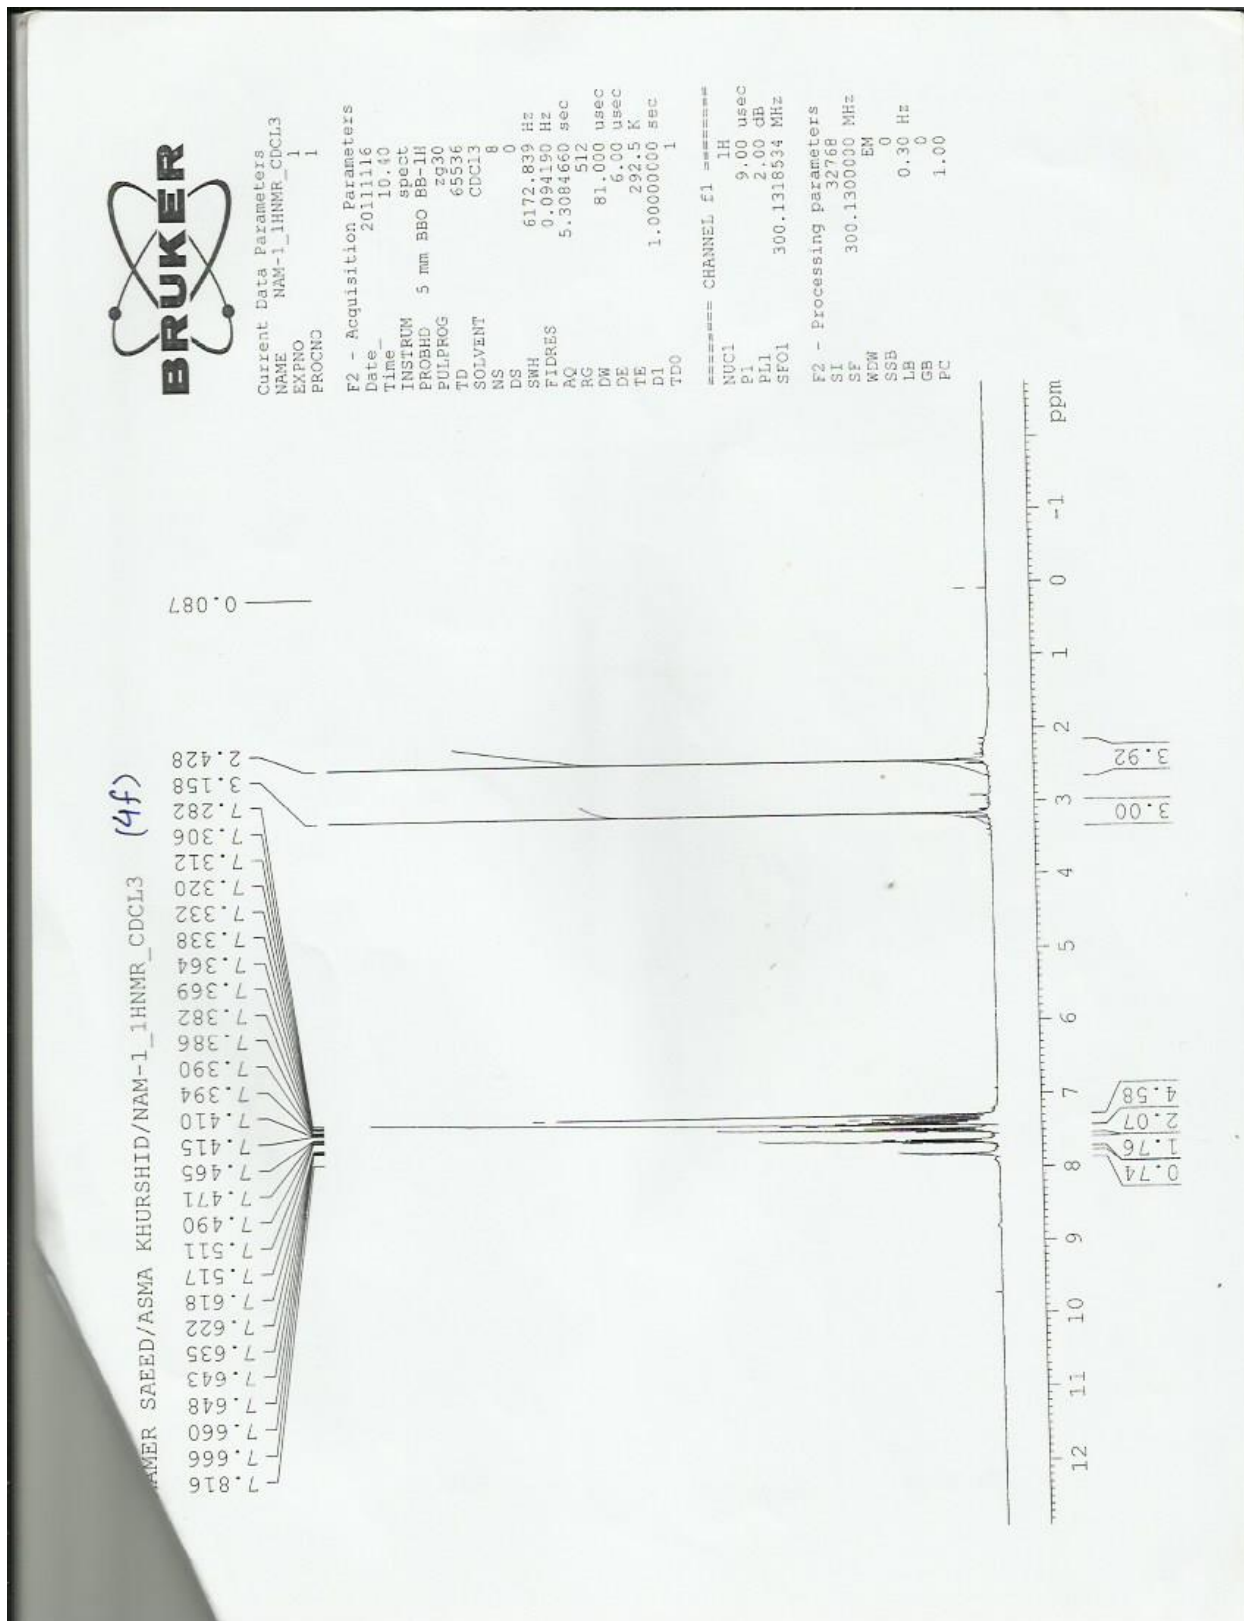

# 4f-<sup>1</sup>H-NMR-b:

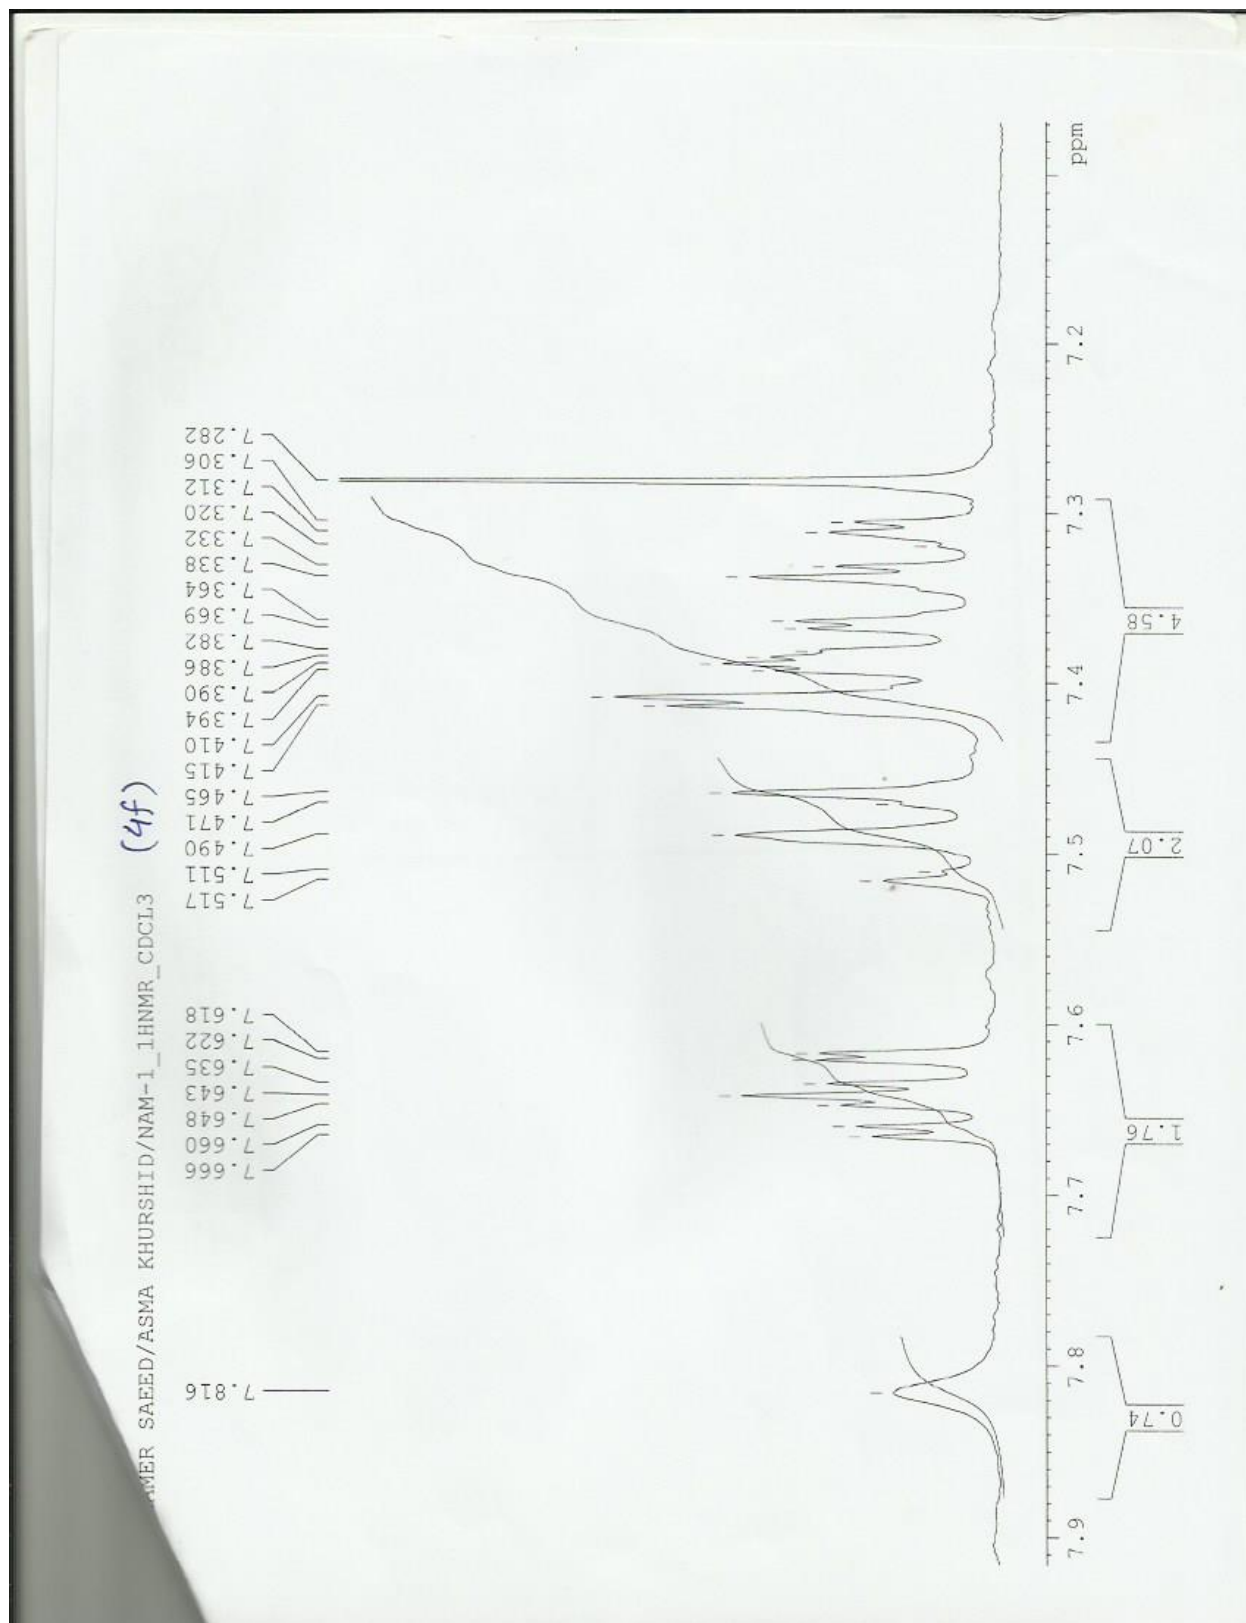

# 4f-<sup>13</sup>C-NMRa:

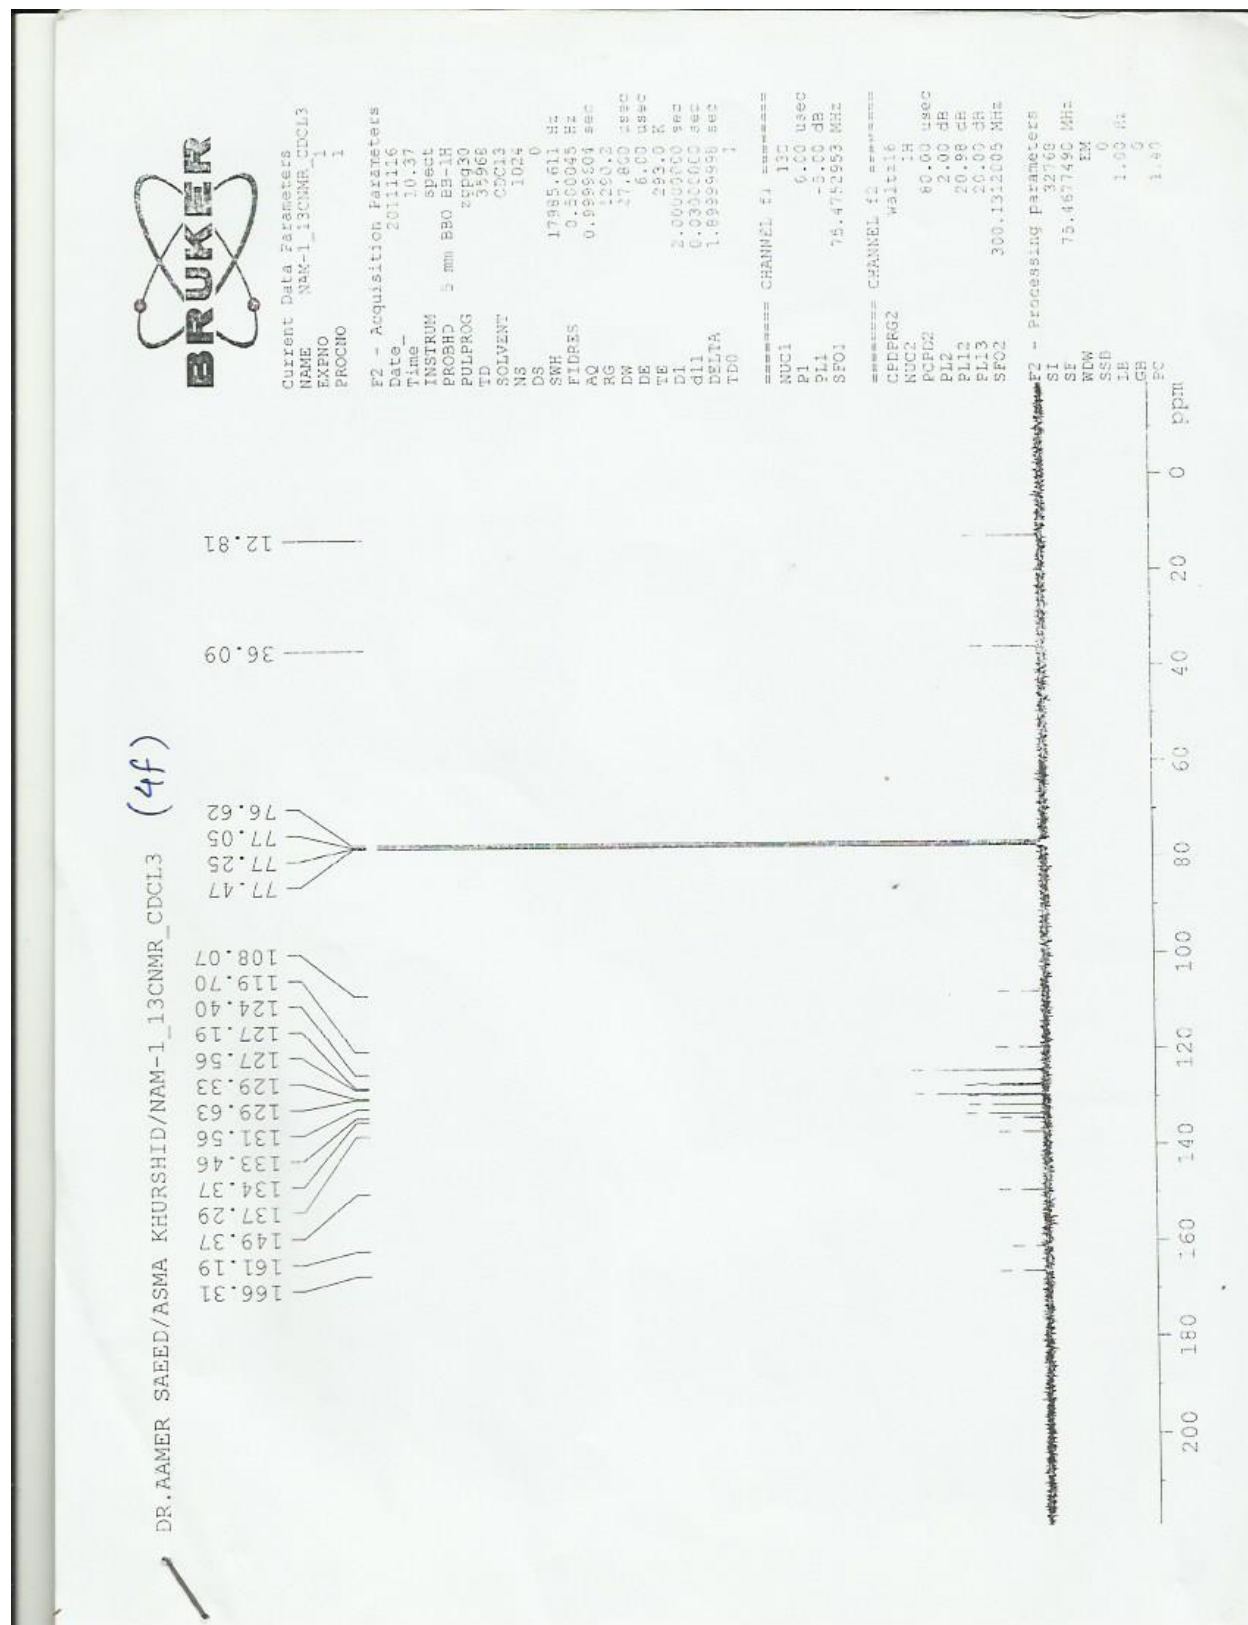

**4f-<sup>13</sup>C-NMR-b:**

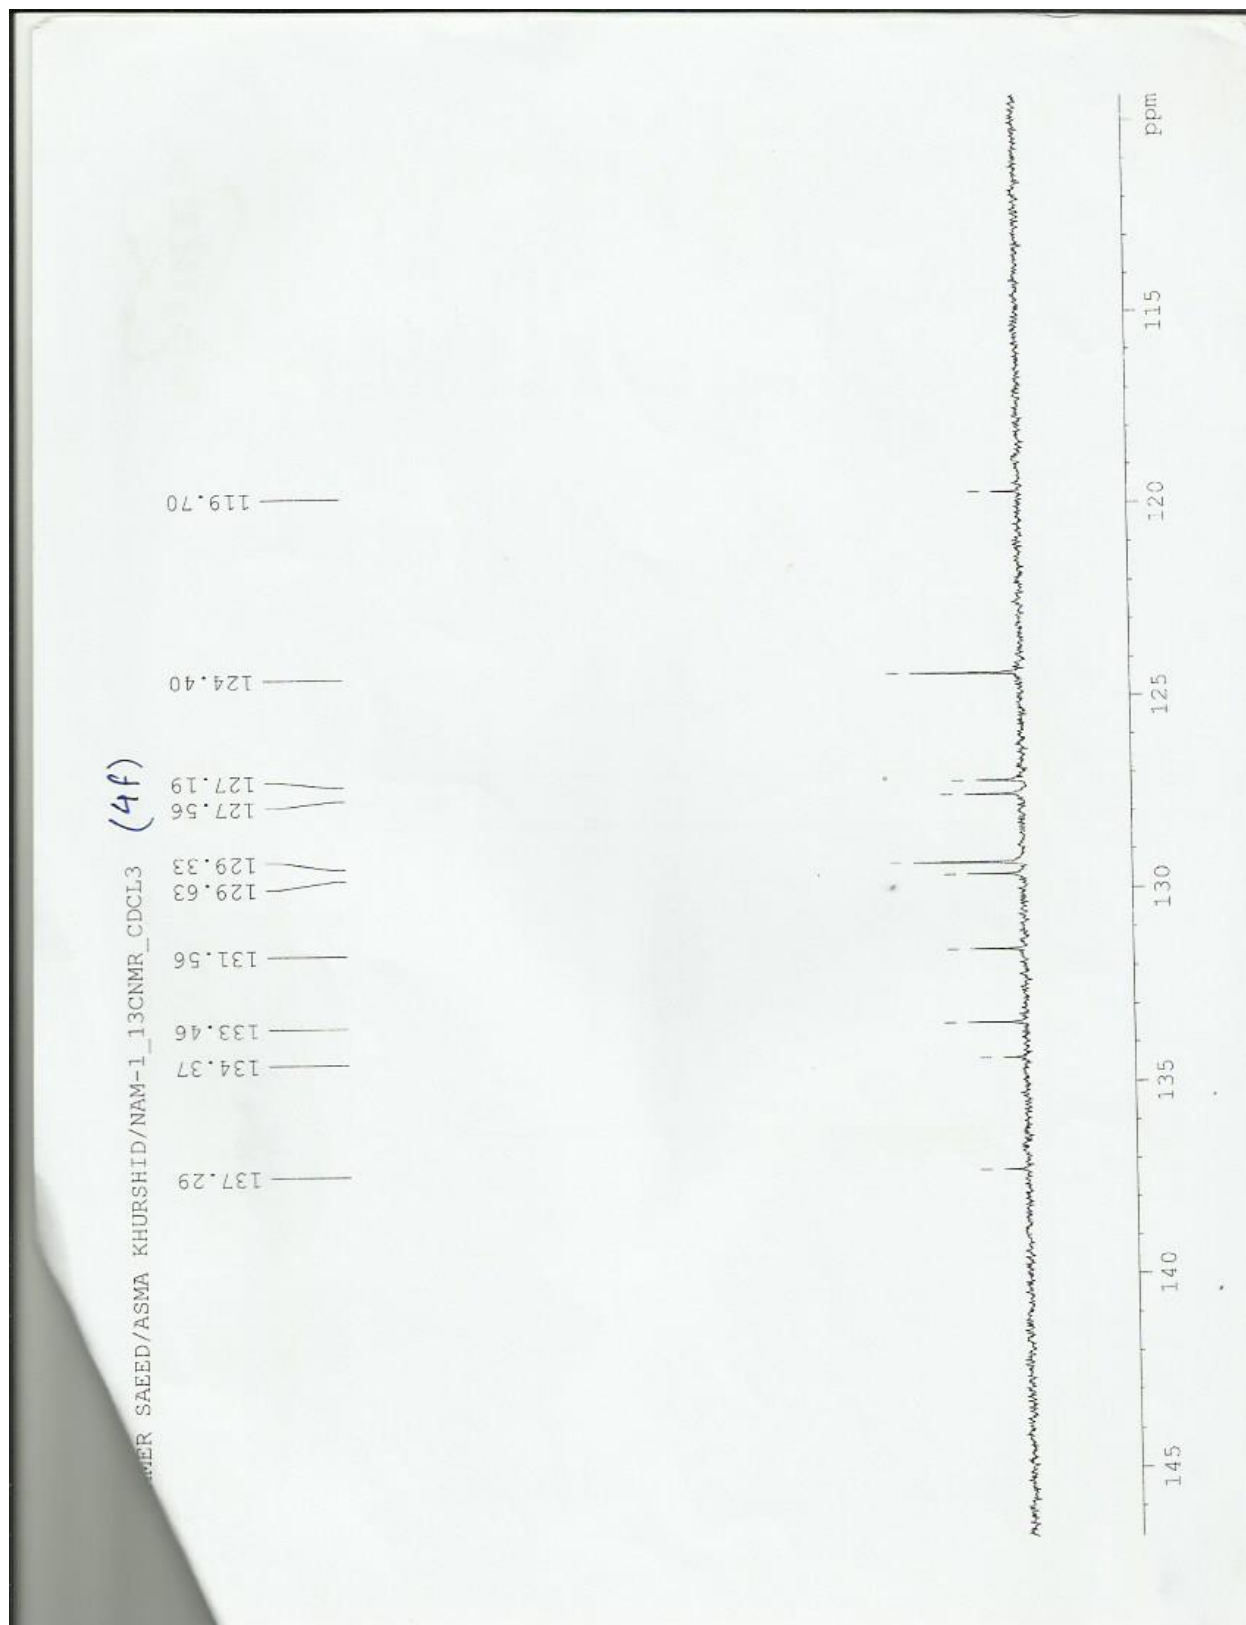



**4g-<sup>13</sup>C-NMR-a:**

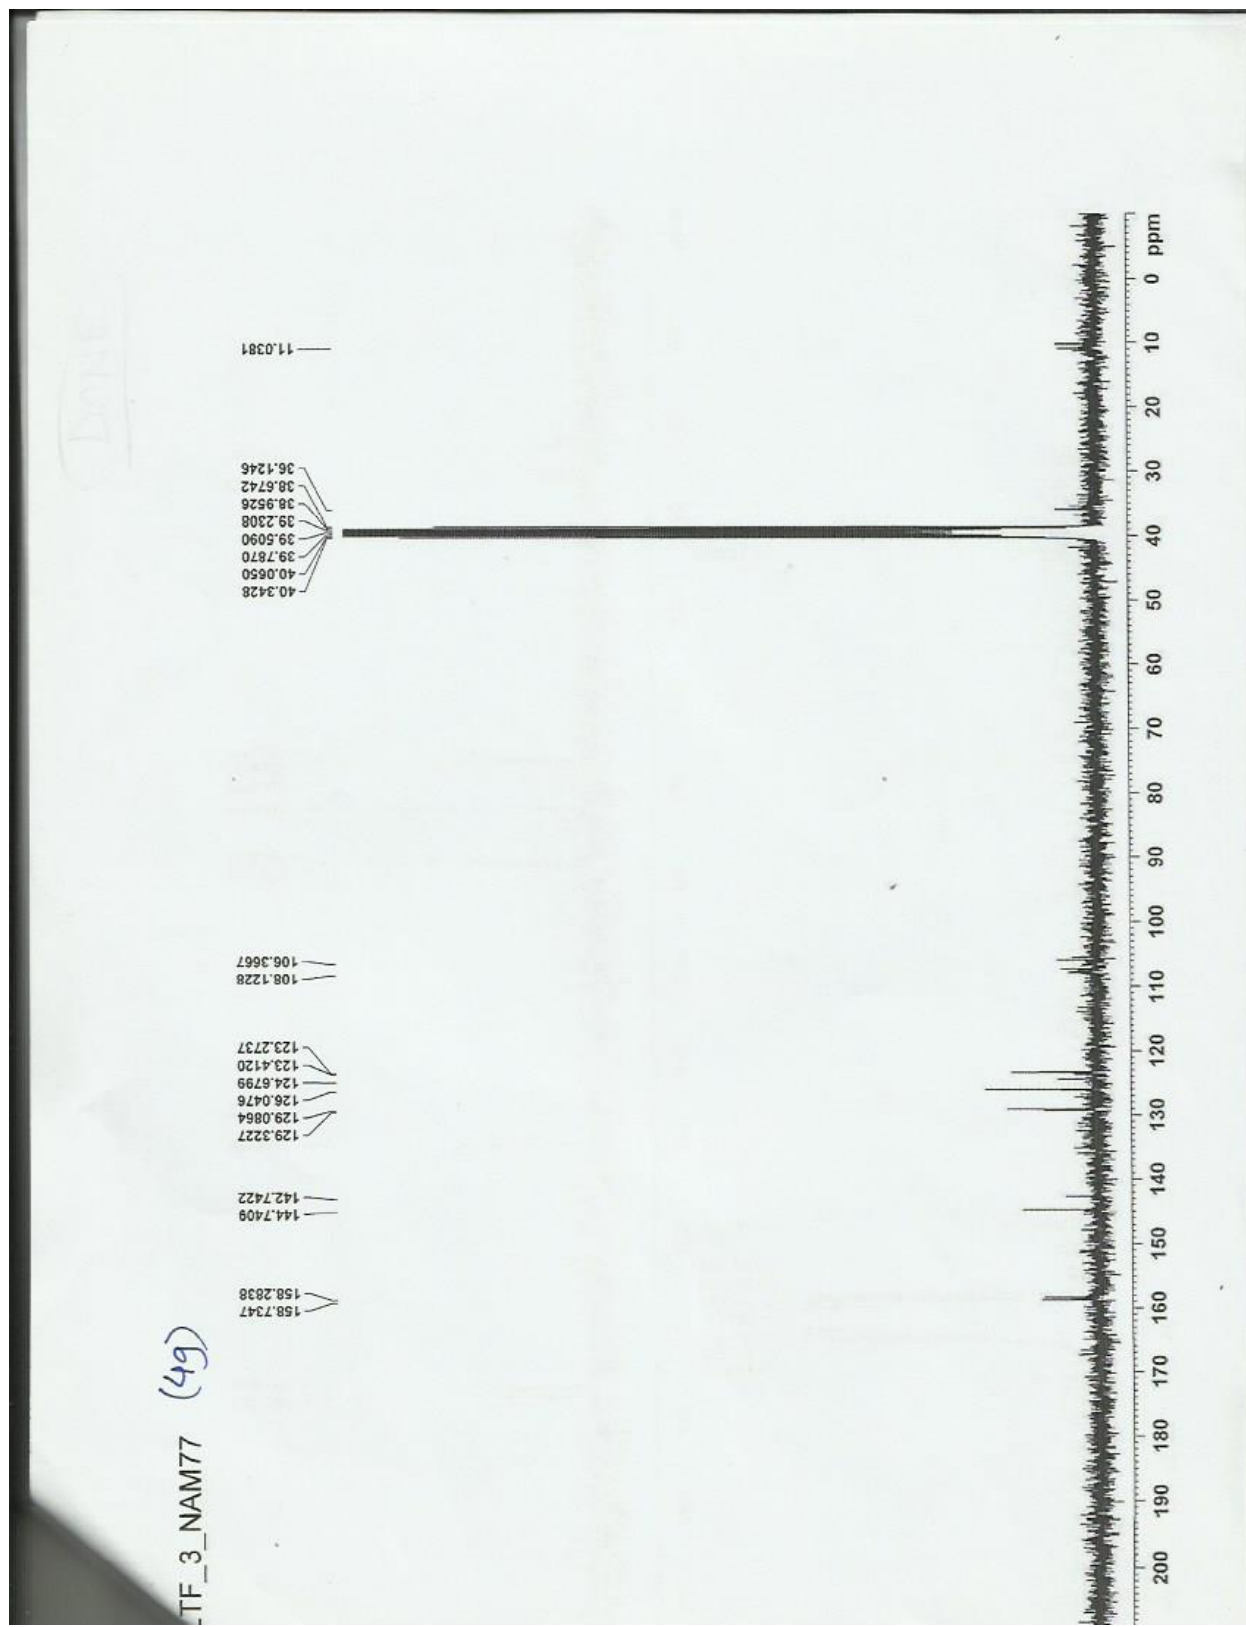





# 4h-<sup>13</sup>C-NMR-a:

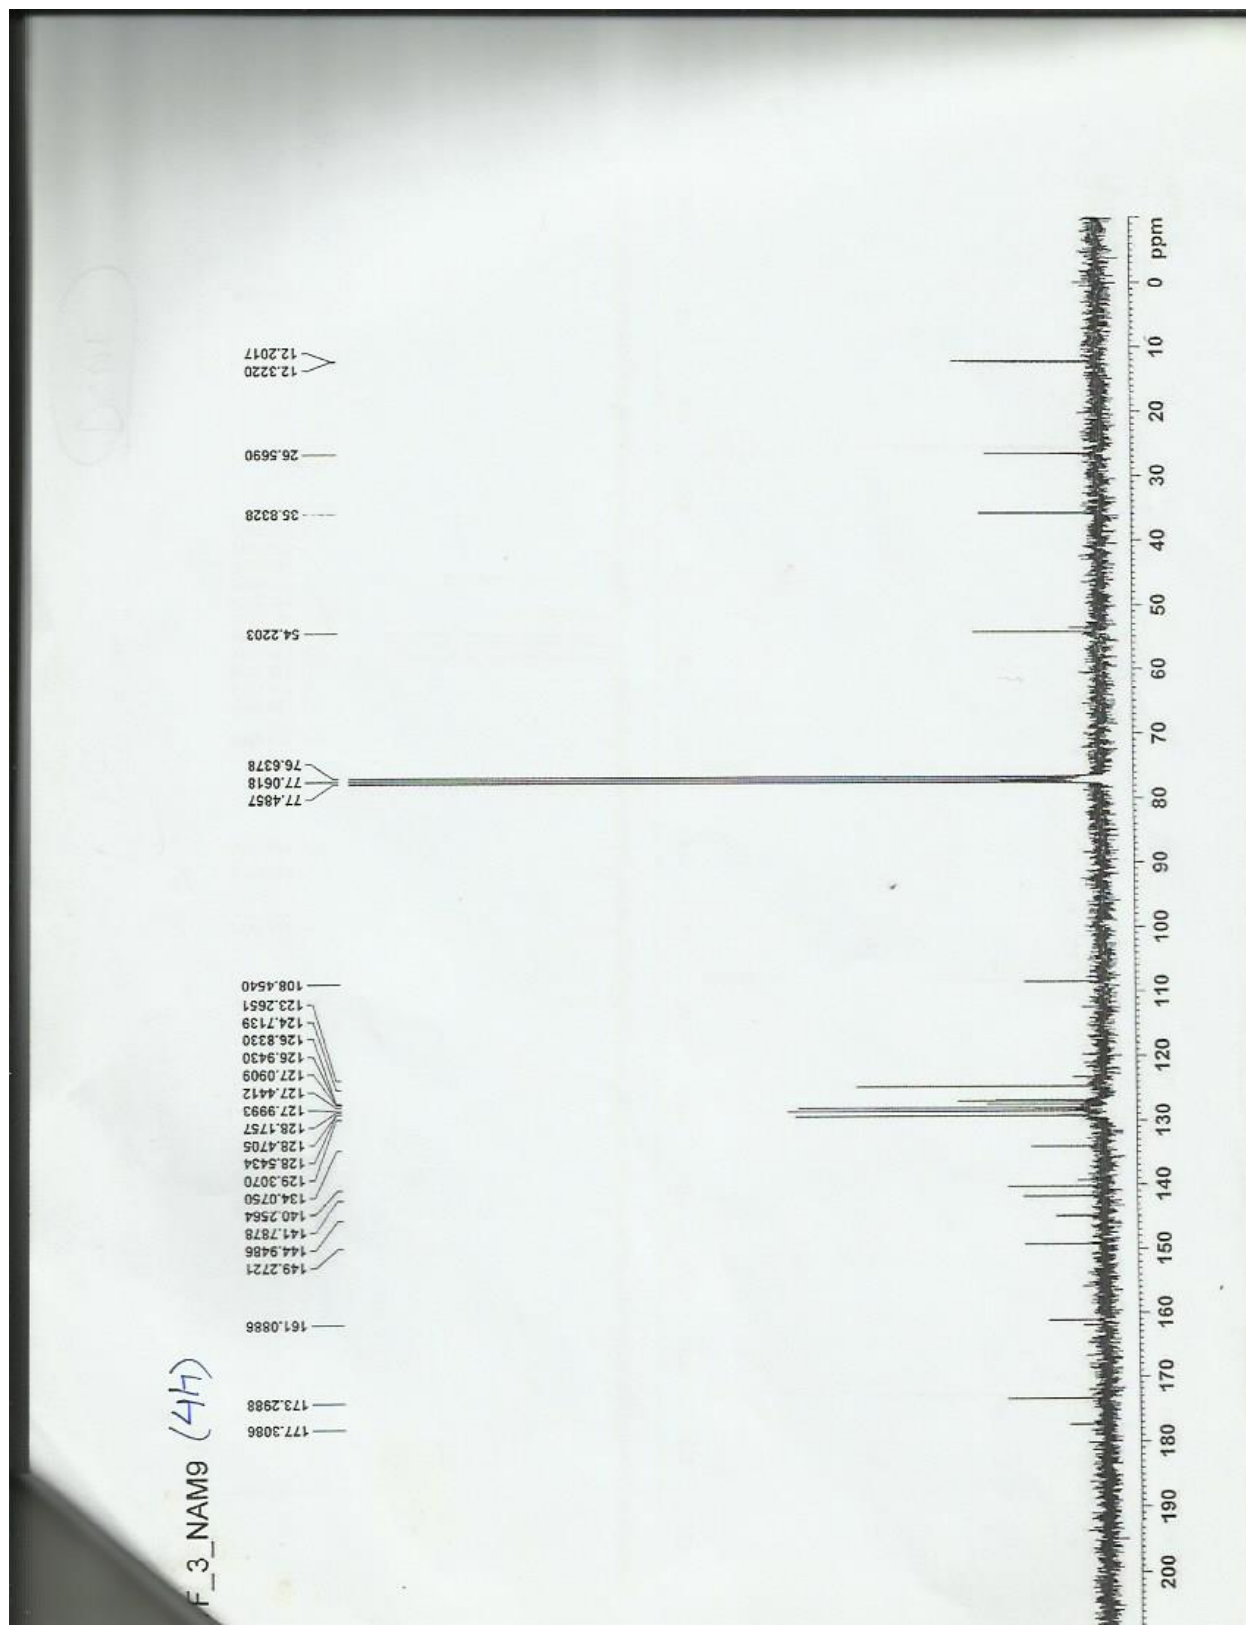

# 4h-<sup>13</sup>C-NMR-b:

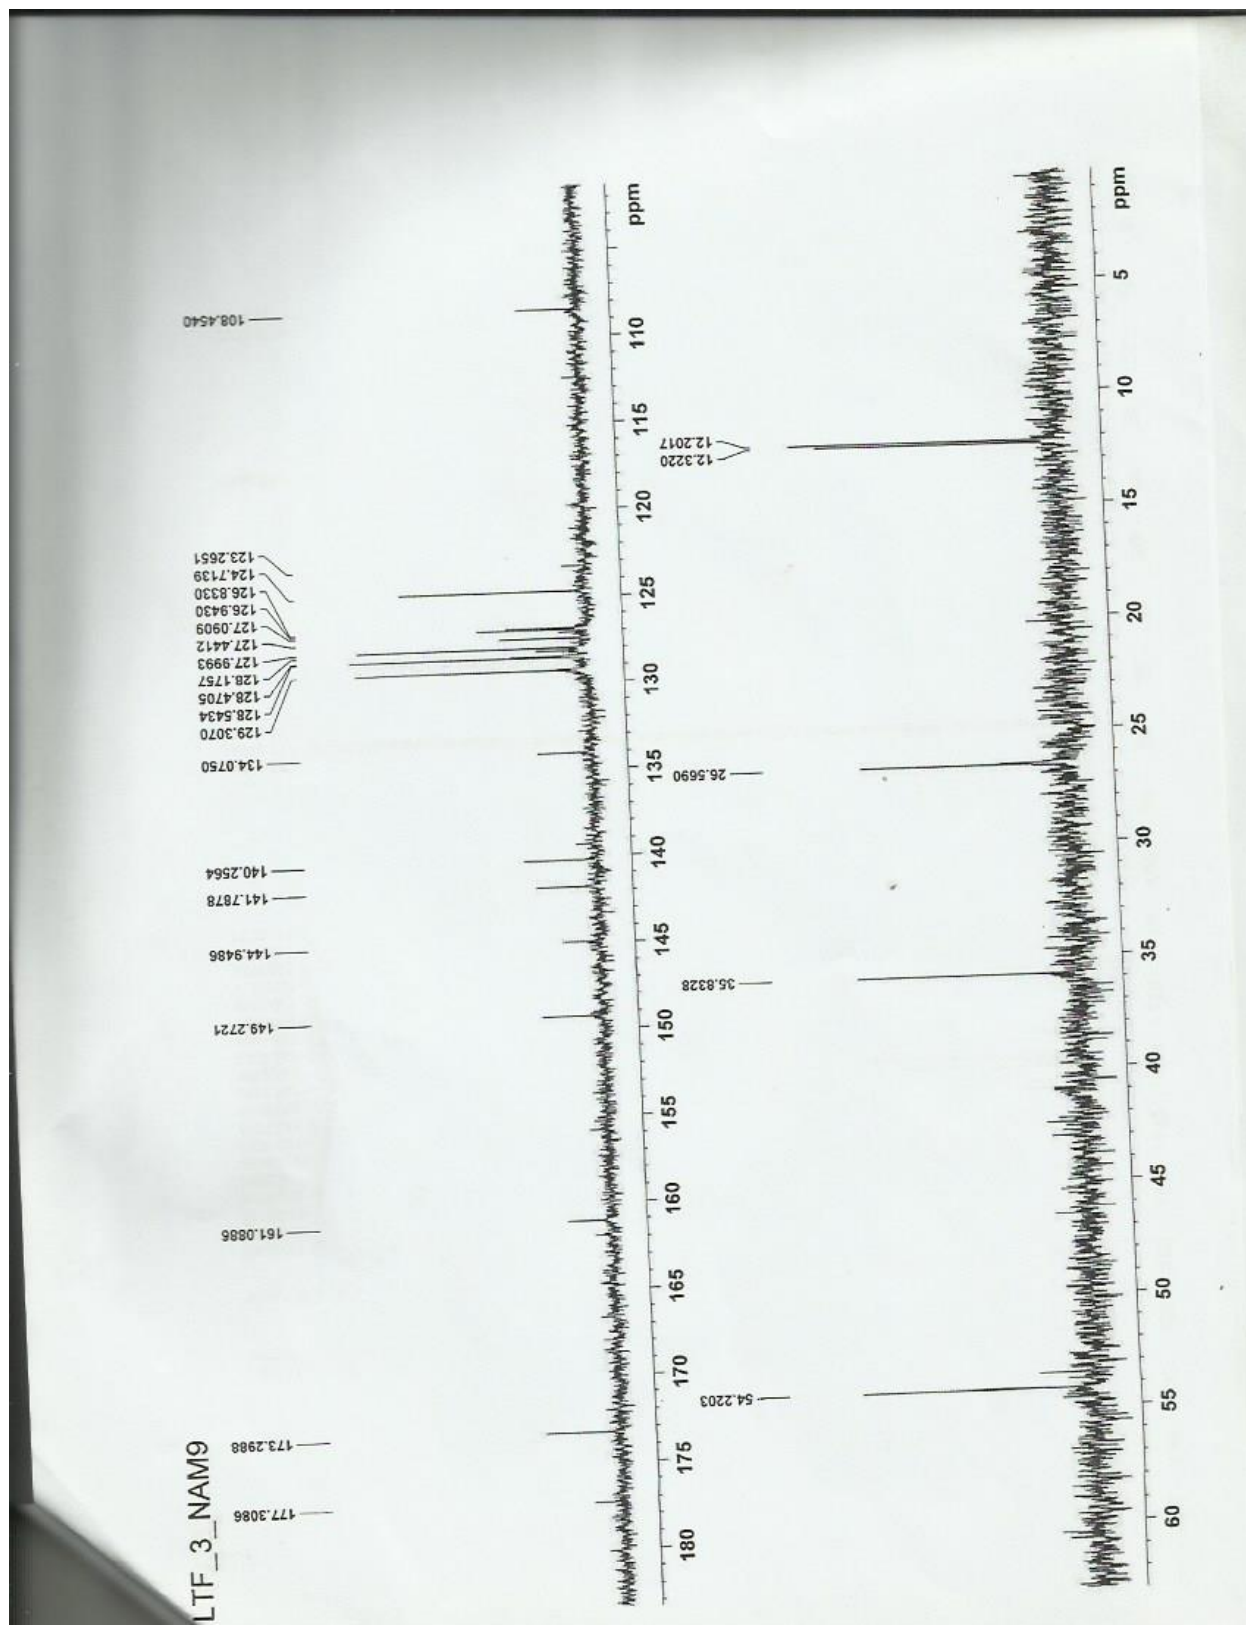

# 4i-<sup>1</sup>H-NMR-a:

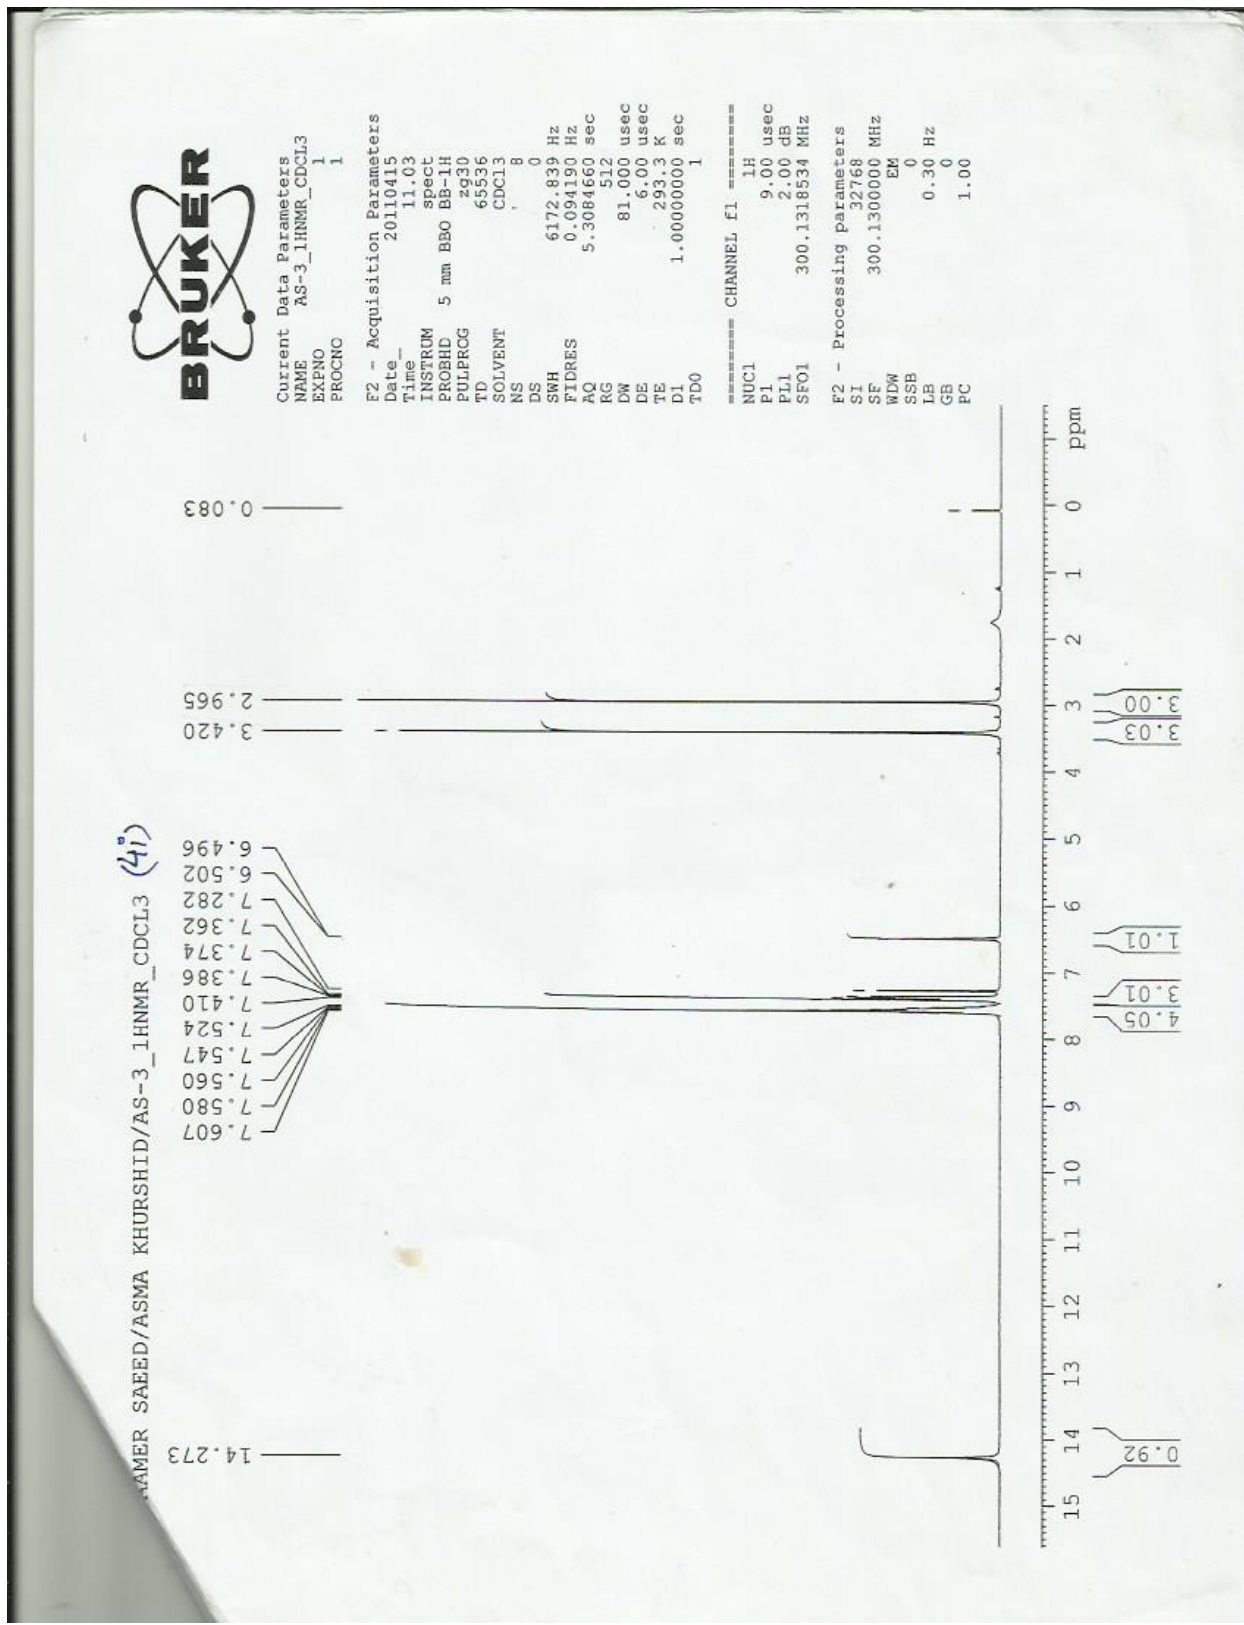

**4i-<sup>1</sup>H-NMR-b:**

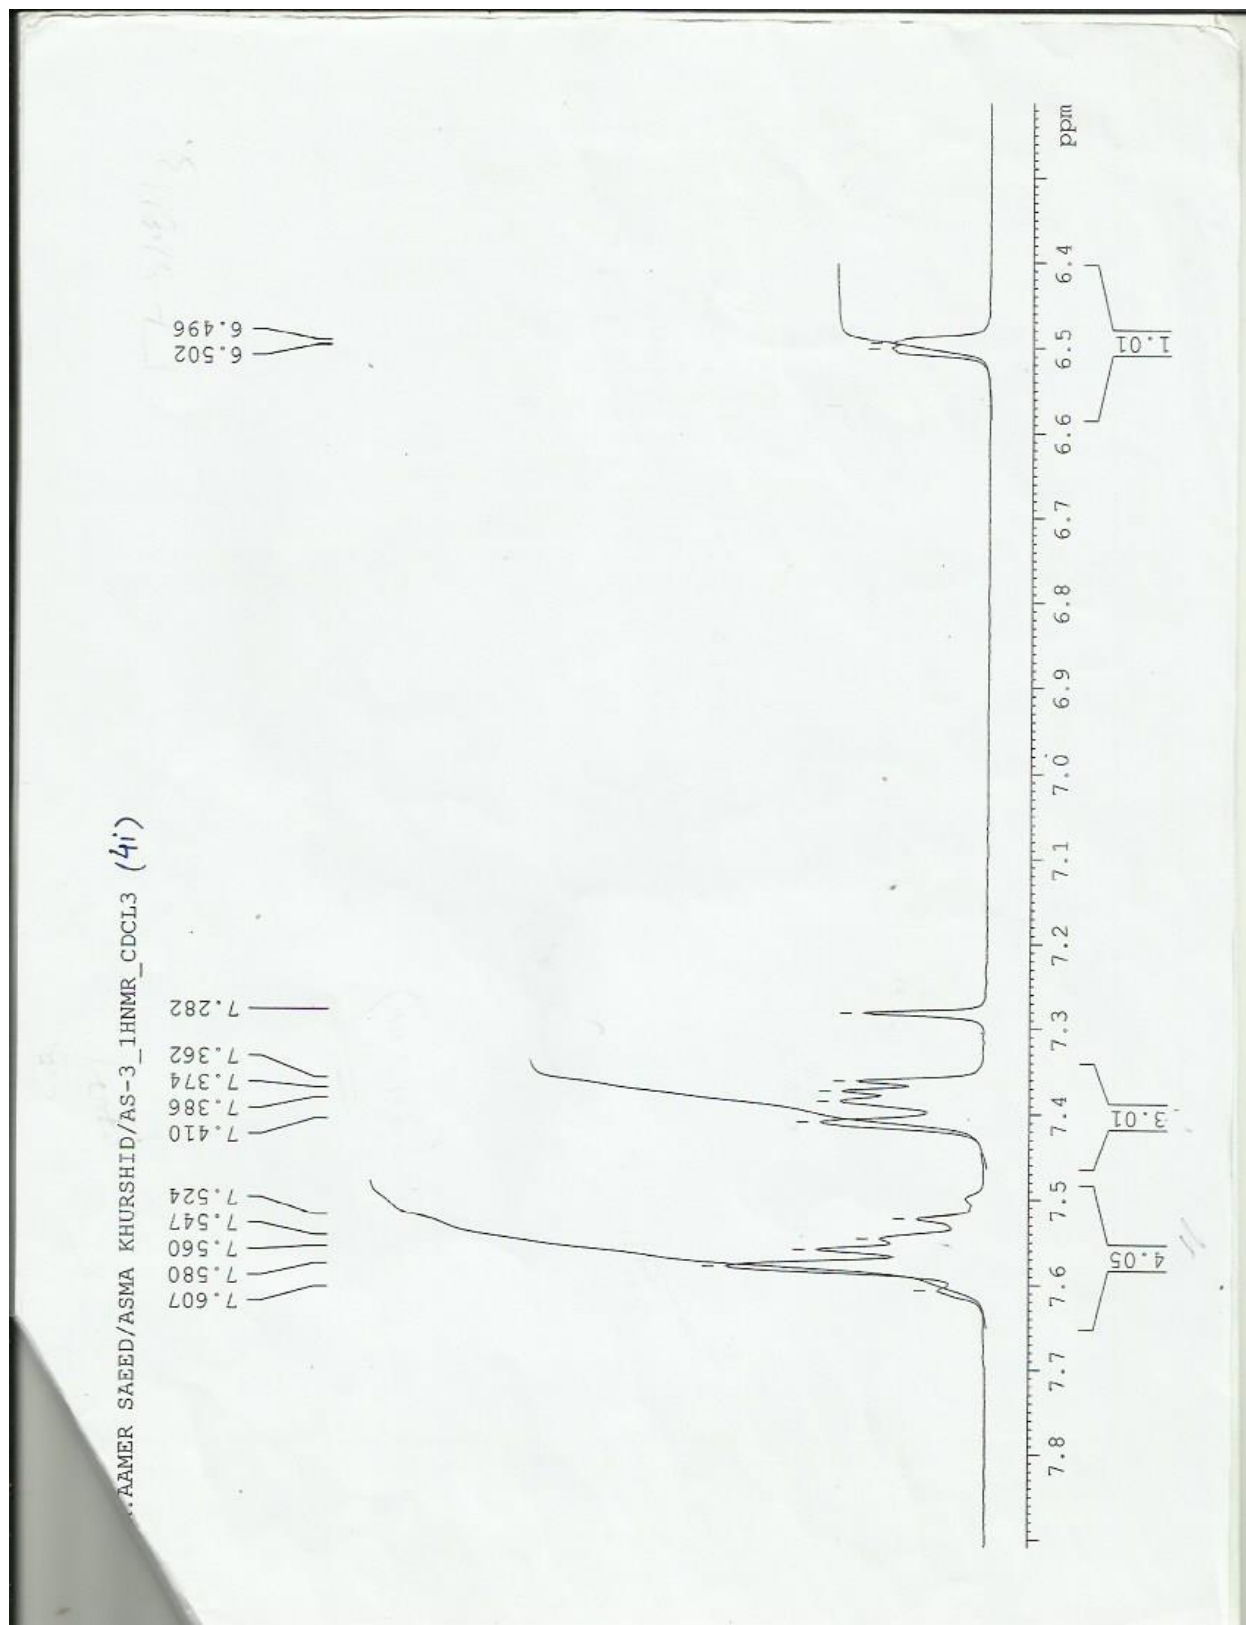



# 4i-<sup>13</sup>C-NMR-a:

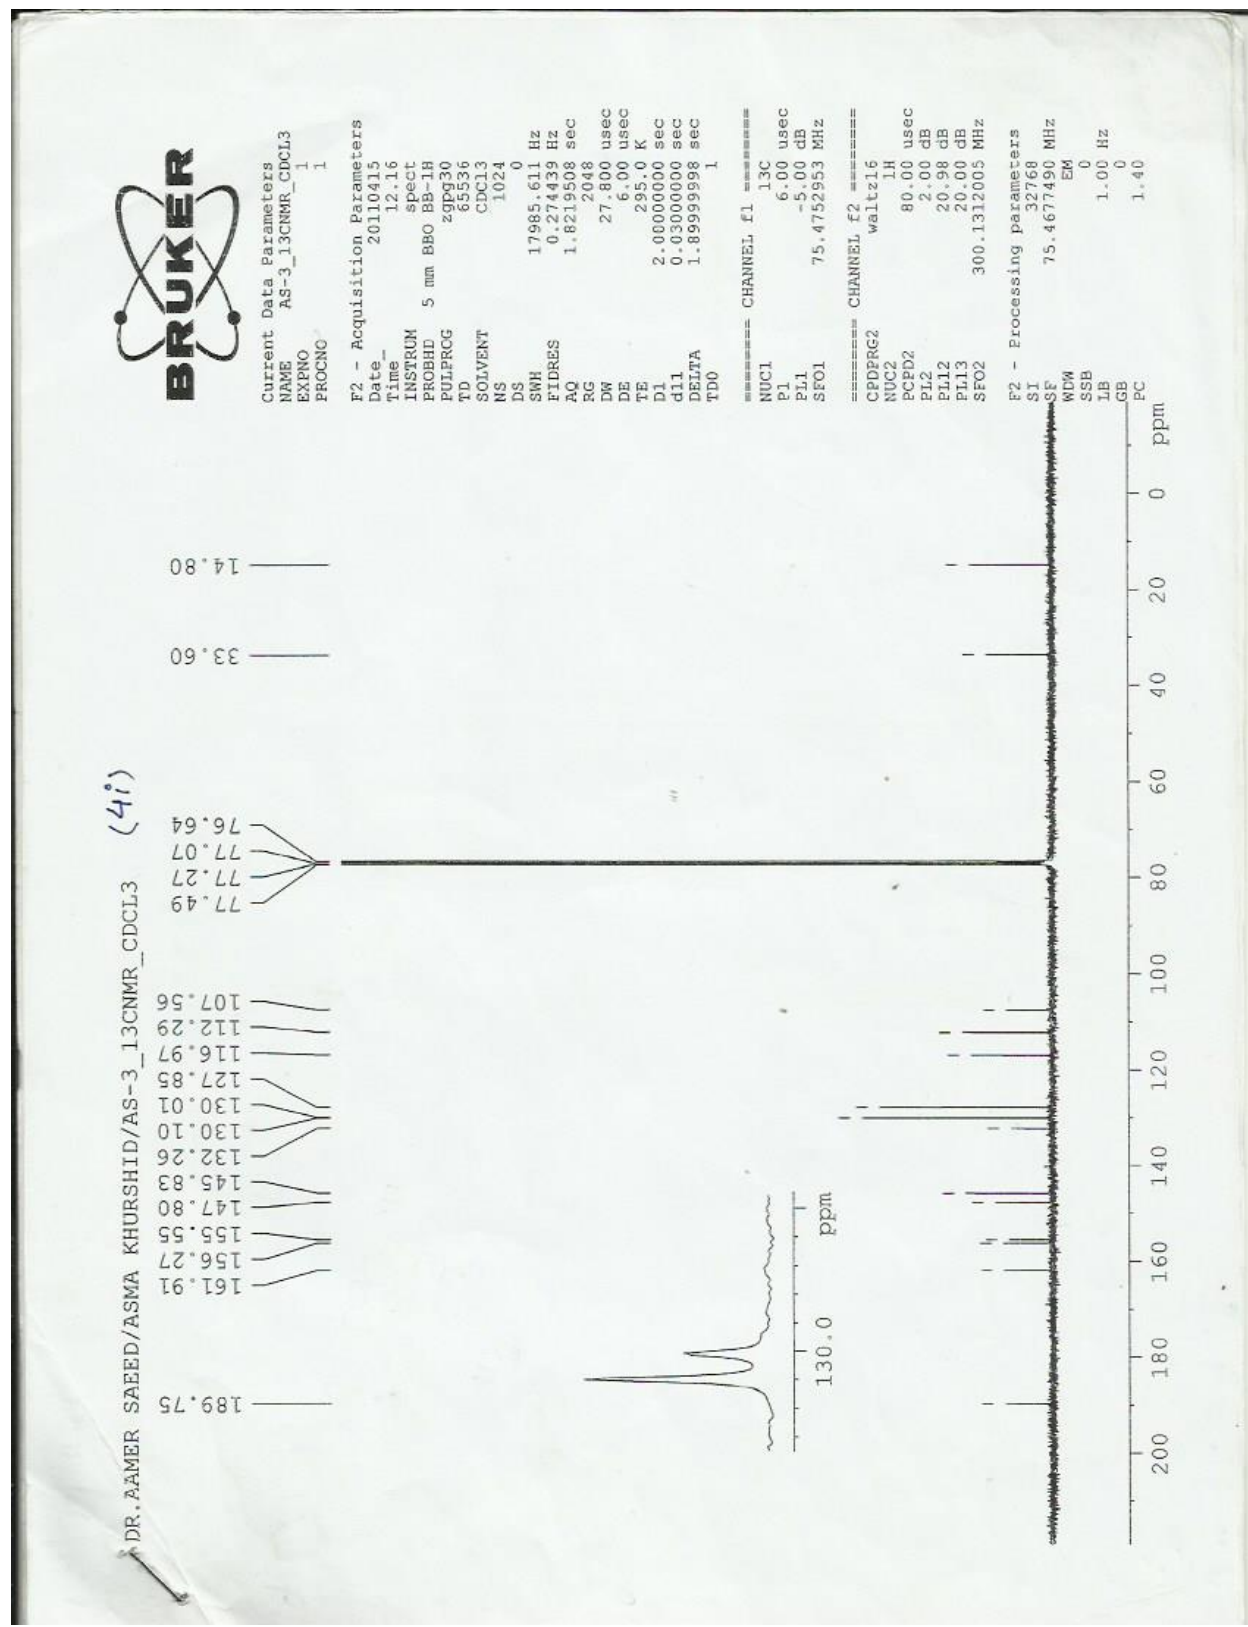





# 4j-<sup>13</sup>C-NMR-a:

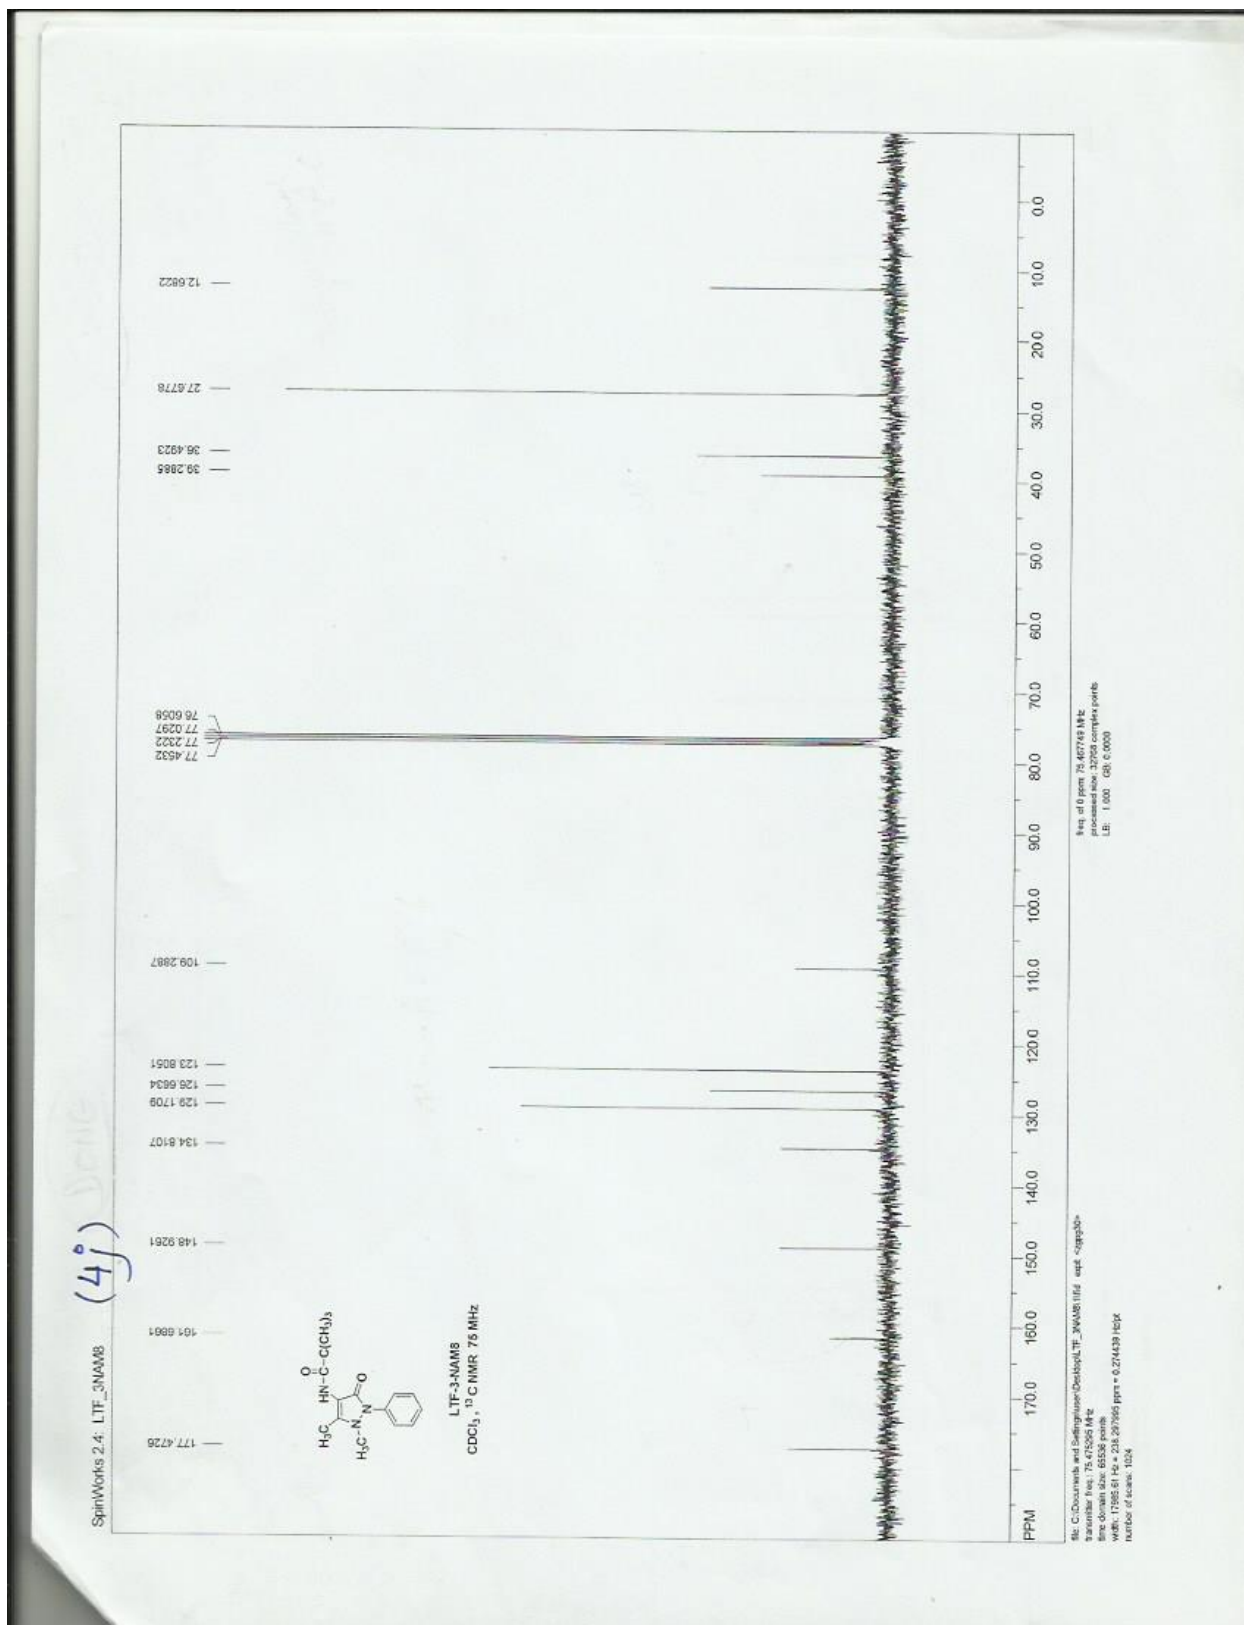

## 4a (LC/MS)

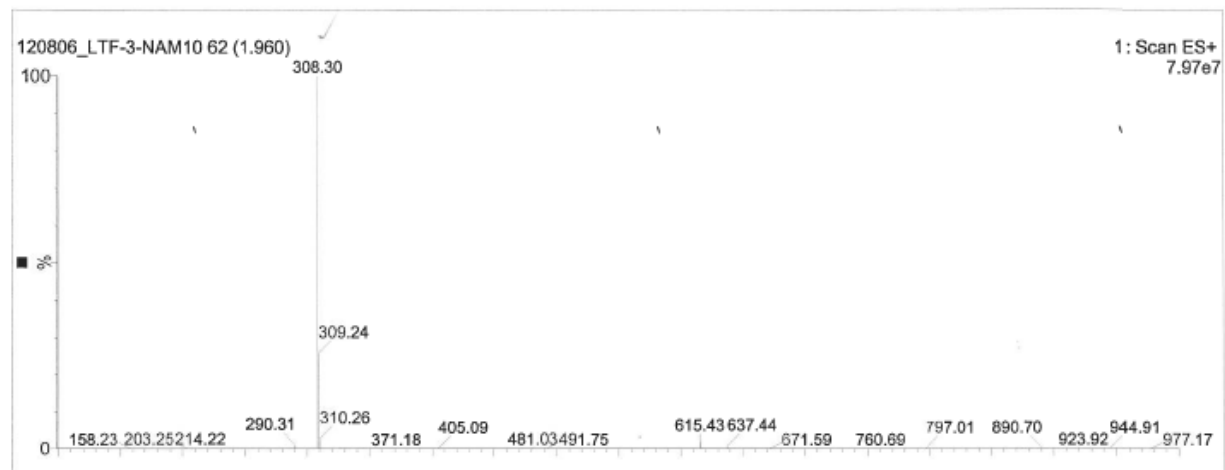

# 4b (GC/MS)

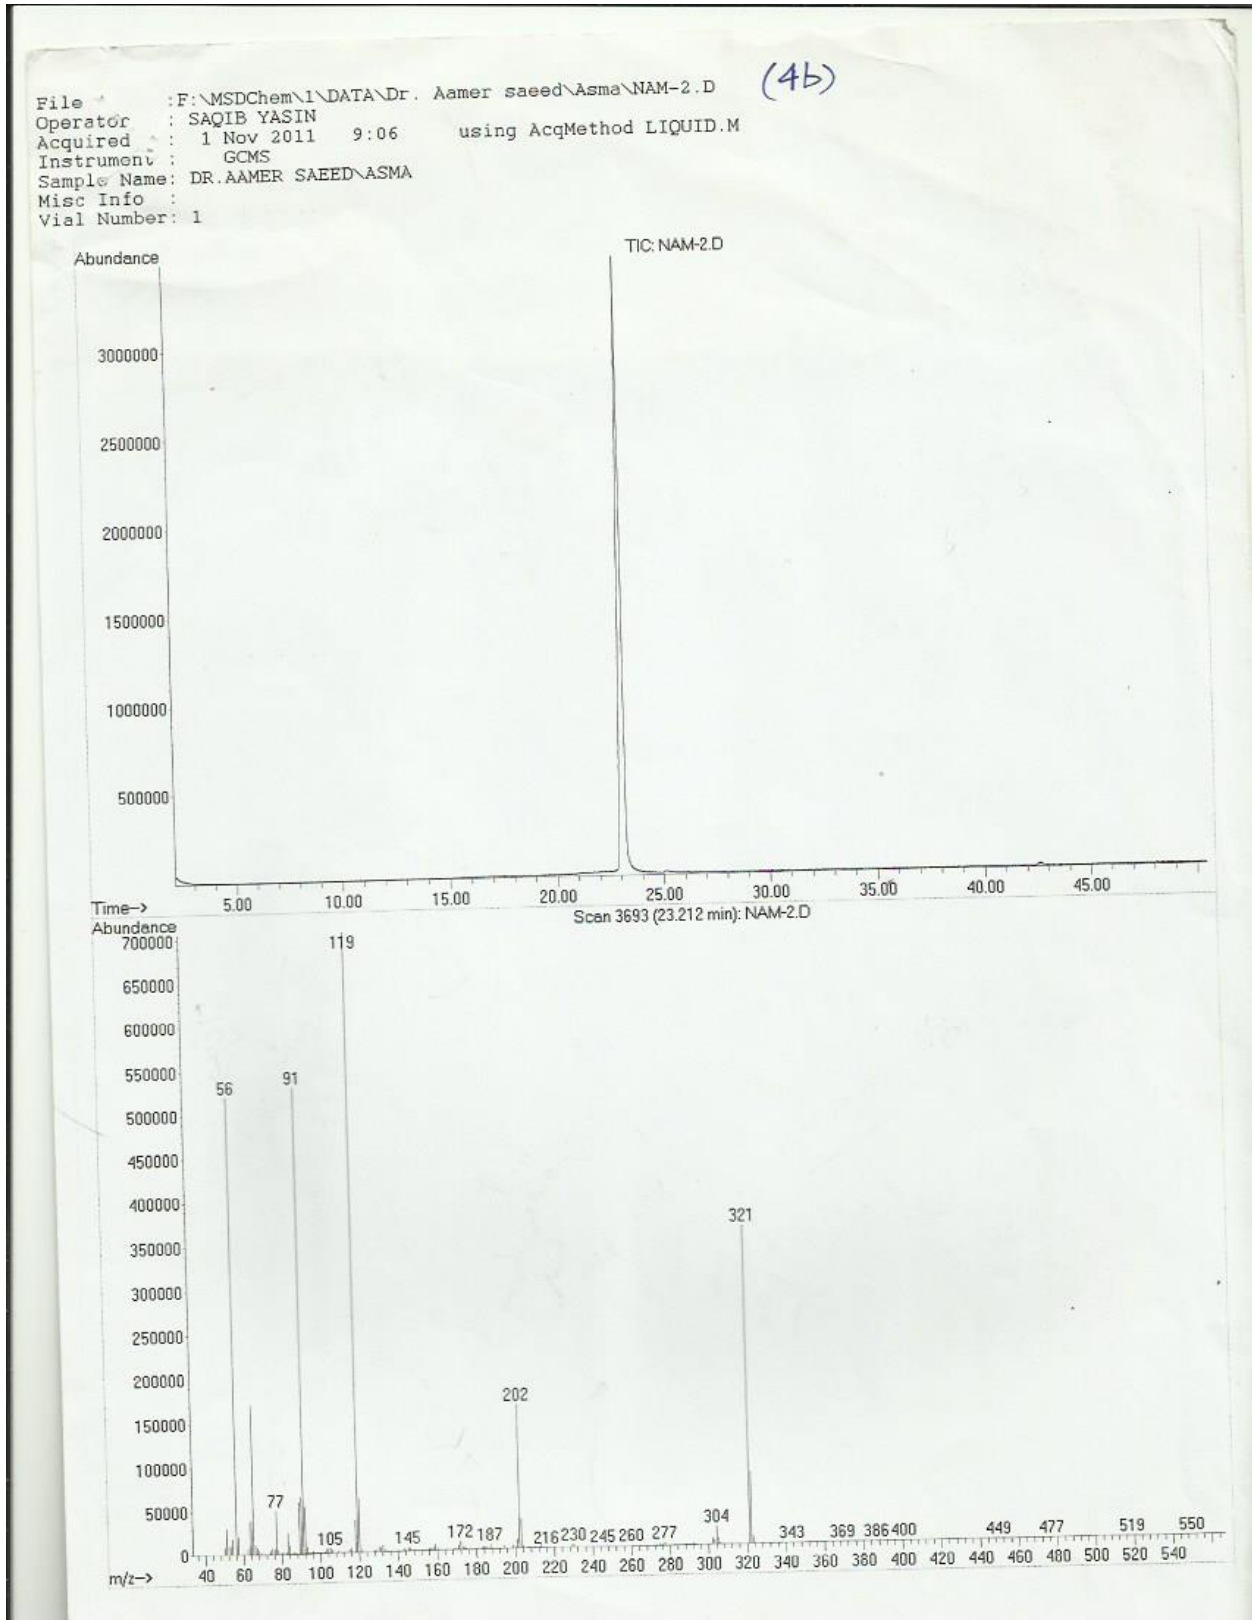

#### 4c (LC/MS)

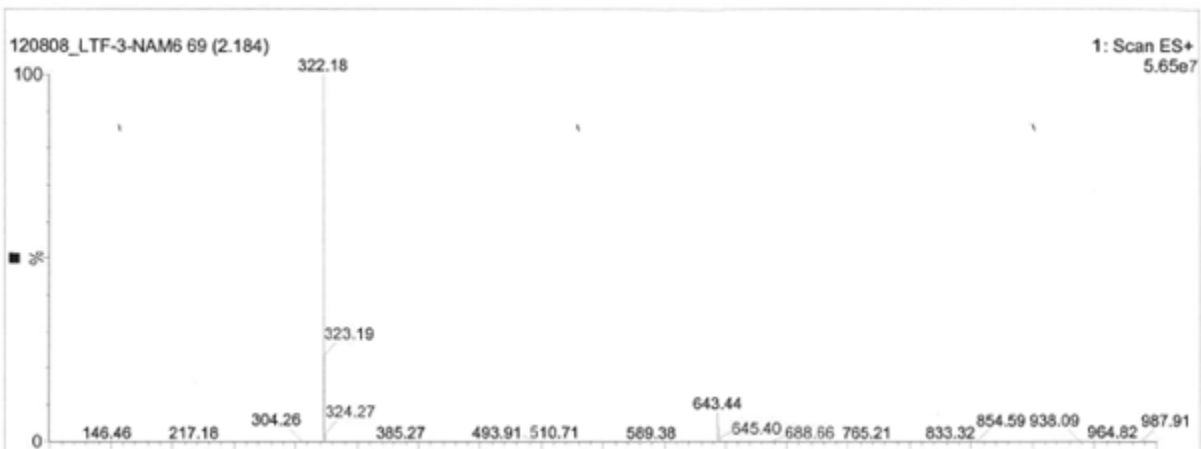

#### 4d (LC/MS)

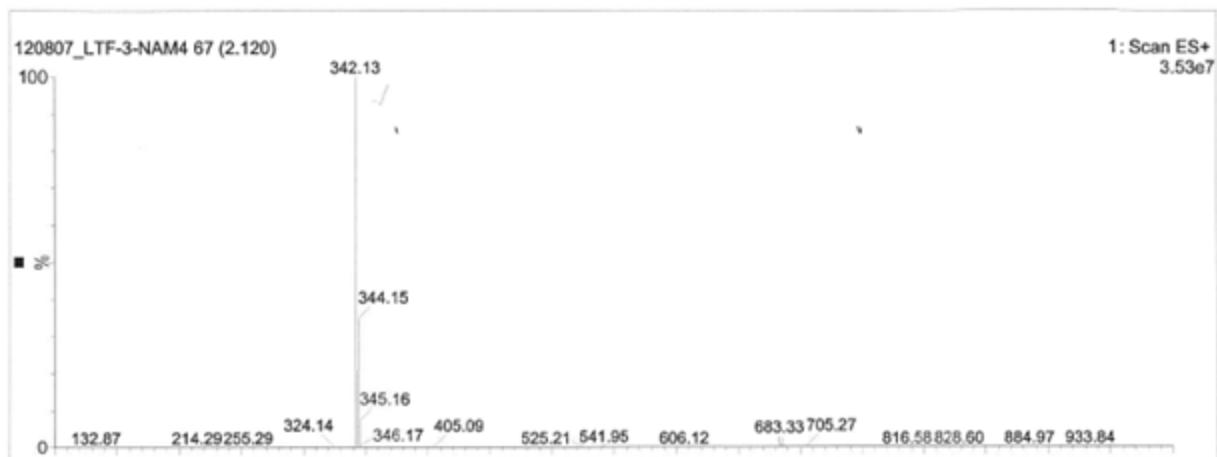

#### 4e (LC/MS)

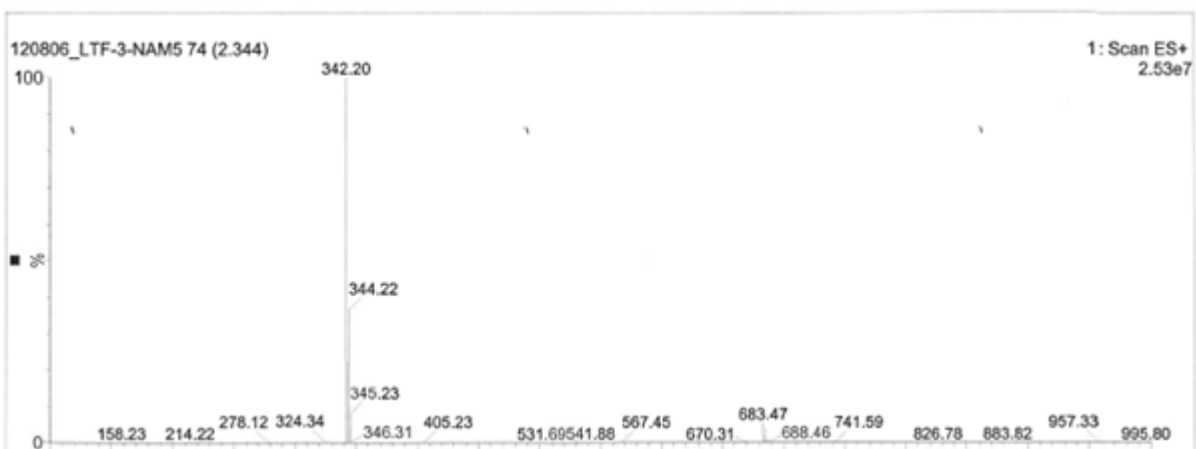

## 4f (LC/MS)

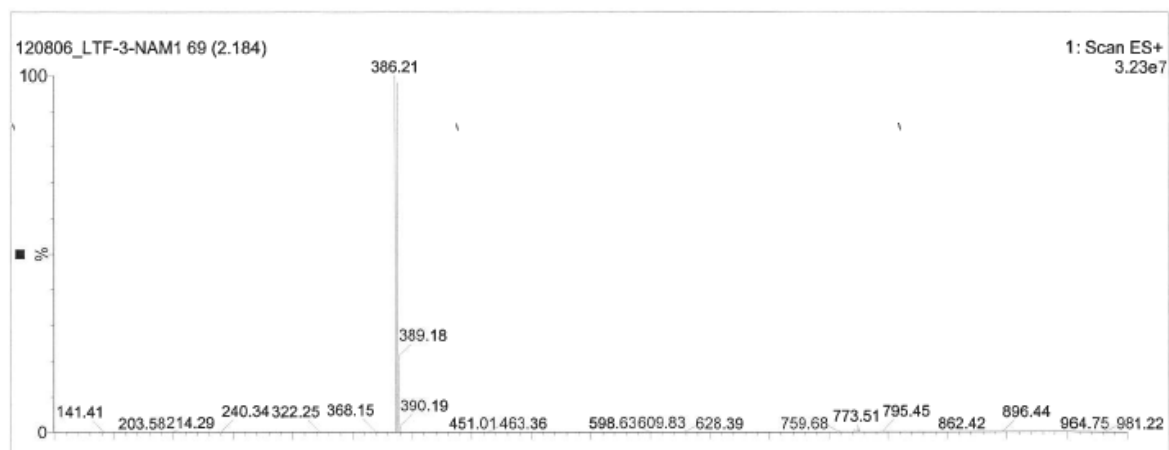

## 4g (LC/MS)

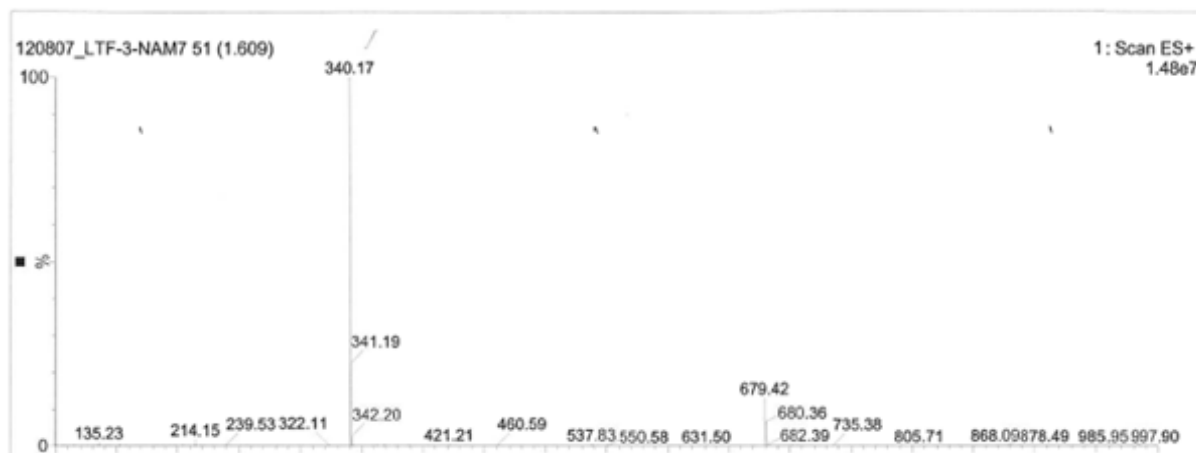

## 4h (LC/MS)

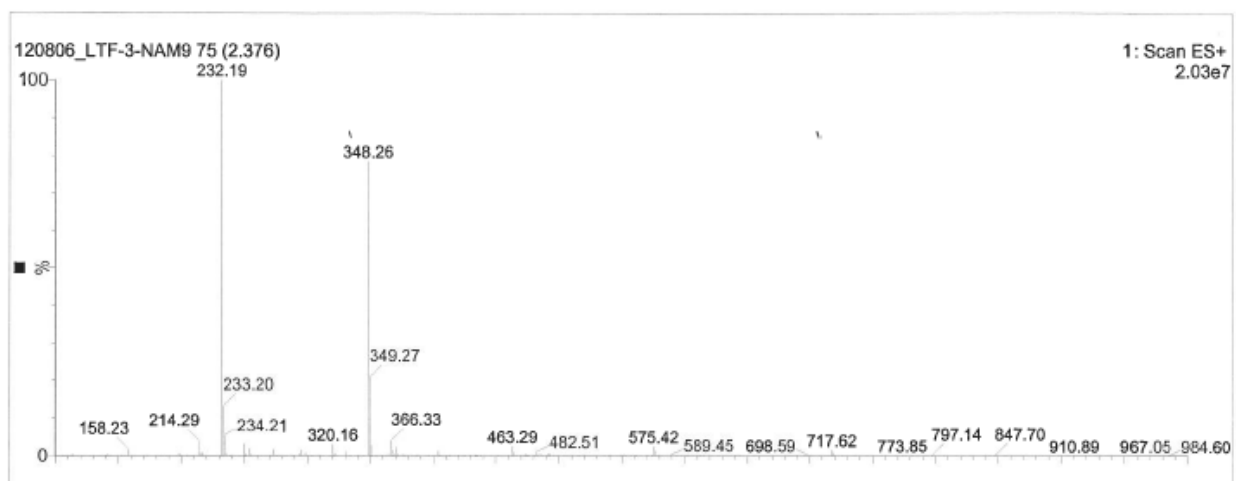



#### 4i (LC/MS)

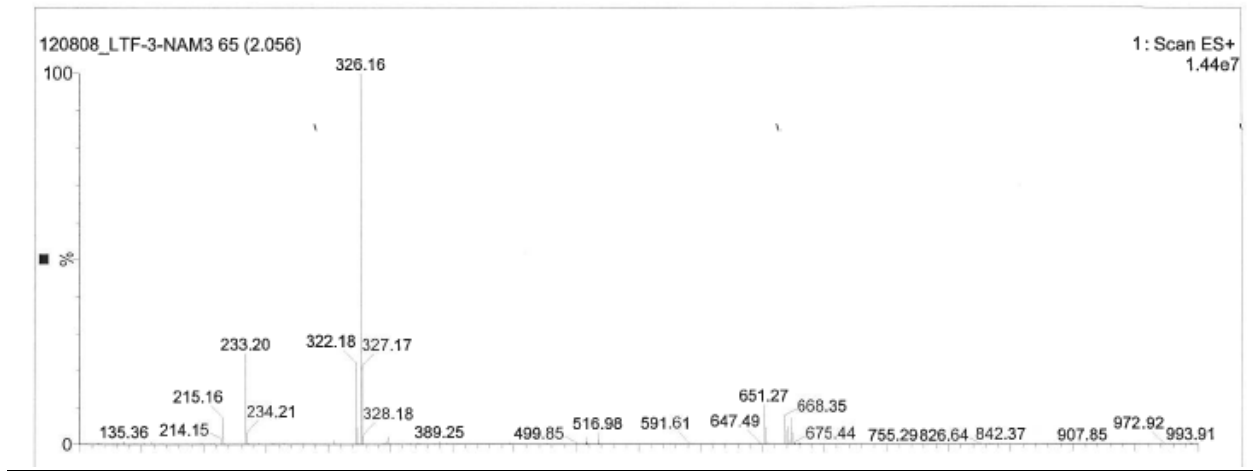

#### 4j (LC/MS)

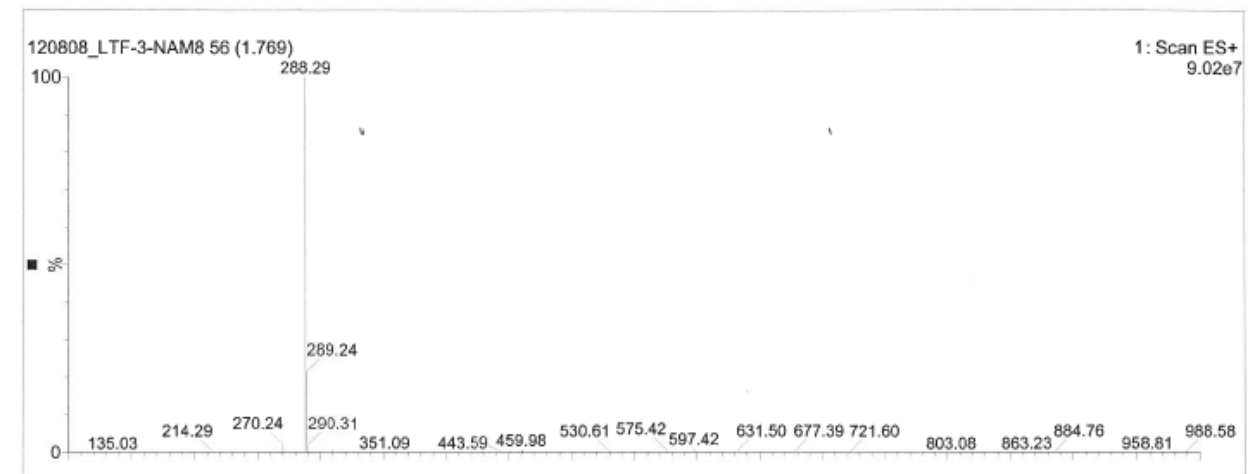

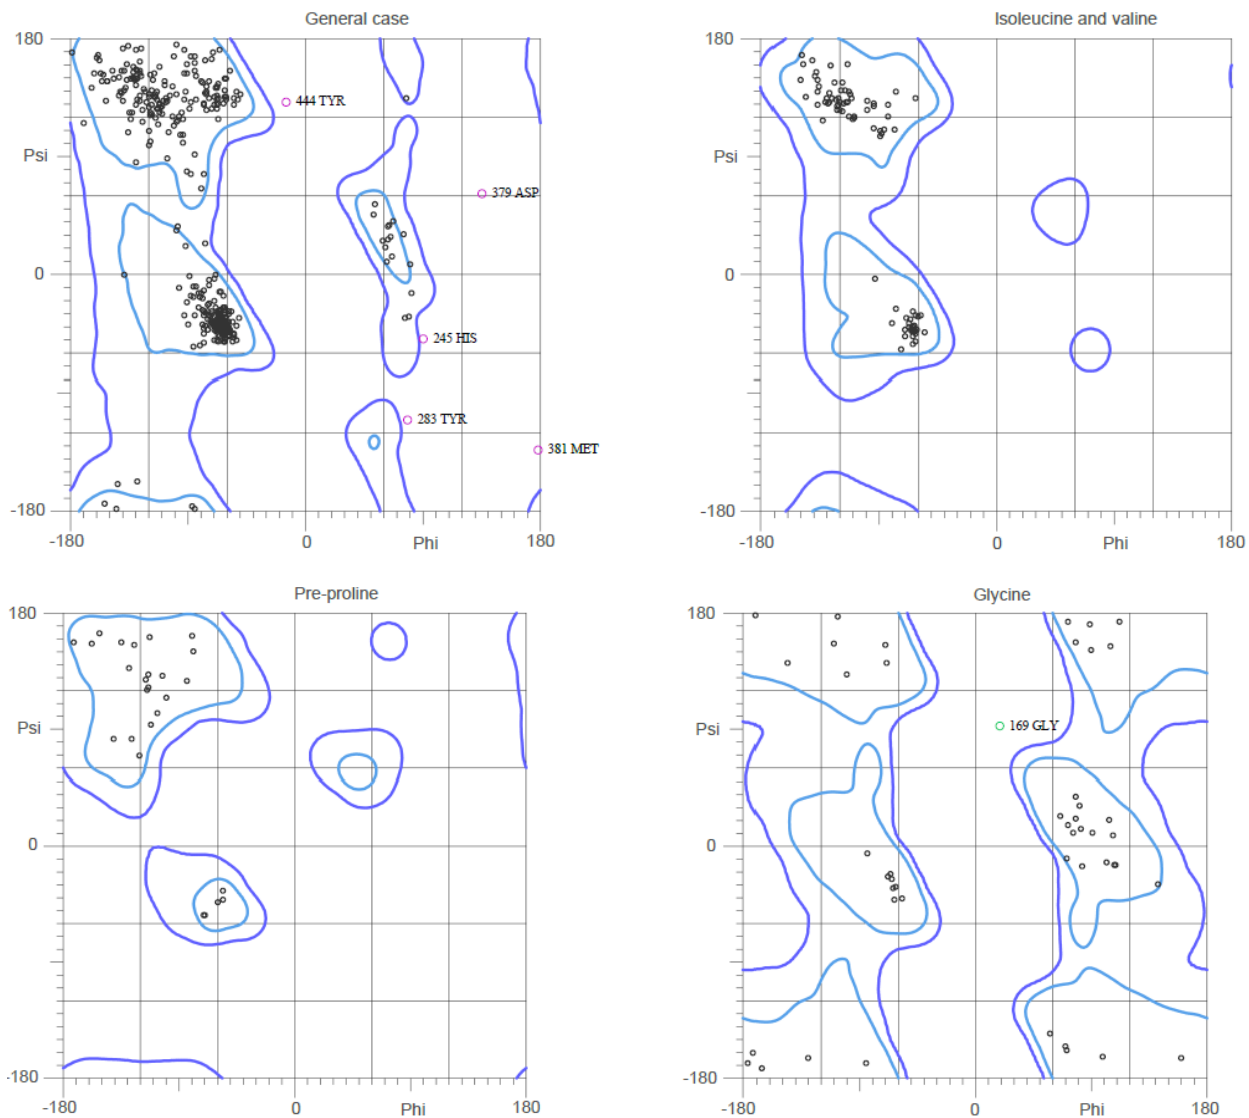

**Figure S1.** Ramachandran Plot of re5NT, (A) General; (B) Isoleucine & Valine; (C) Pre-Proline; (D) Glycine. 96.5% (554/574) of all residues are in favored (98%) regions. 99.0% (568/574) of all residues are in allowed (>99.8%) regions.

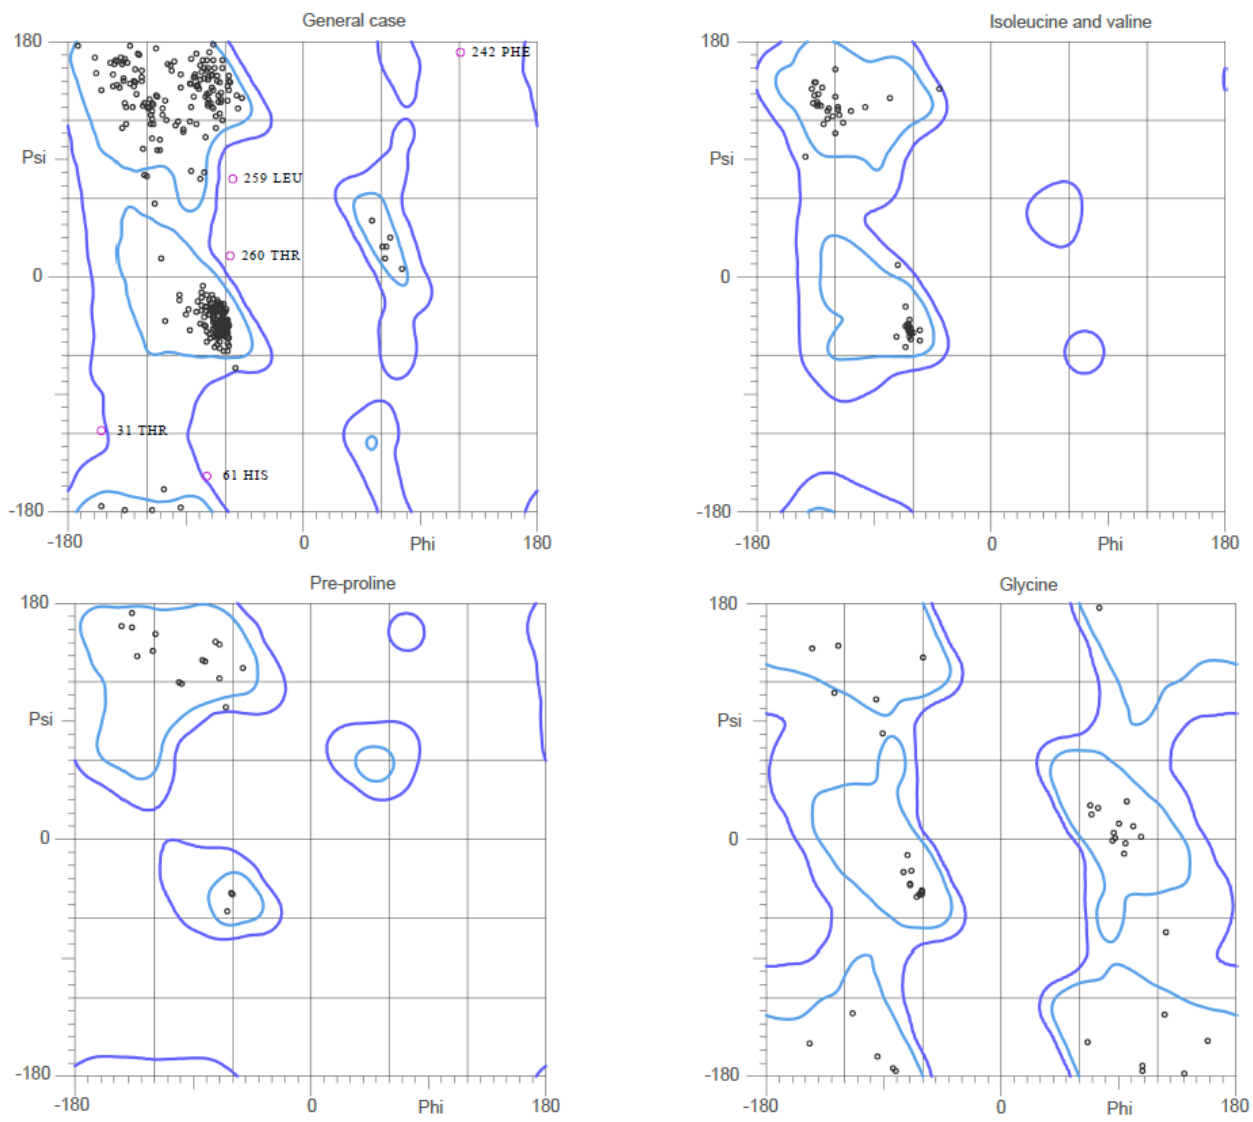

**Figure S2.** Ramachandran Plot of hTNAP, (A) General; (B) Isoleucine & Valine; (C) Pre-Proline; (D) Glycine. 96.0% (459/478) of all residues are in favored (98%) regions. 98.5% (471/478) of all residues are in allowed (>99.8%) regions.

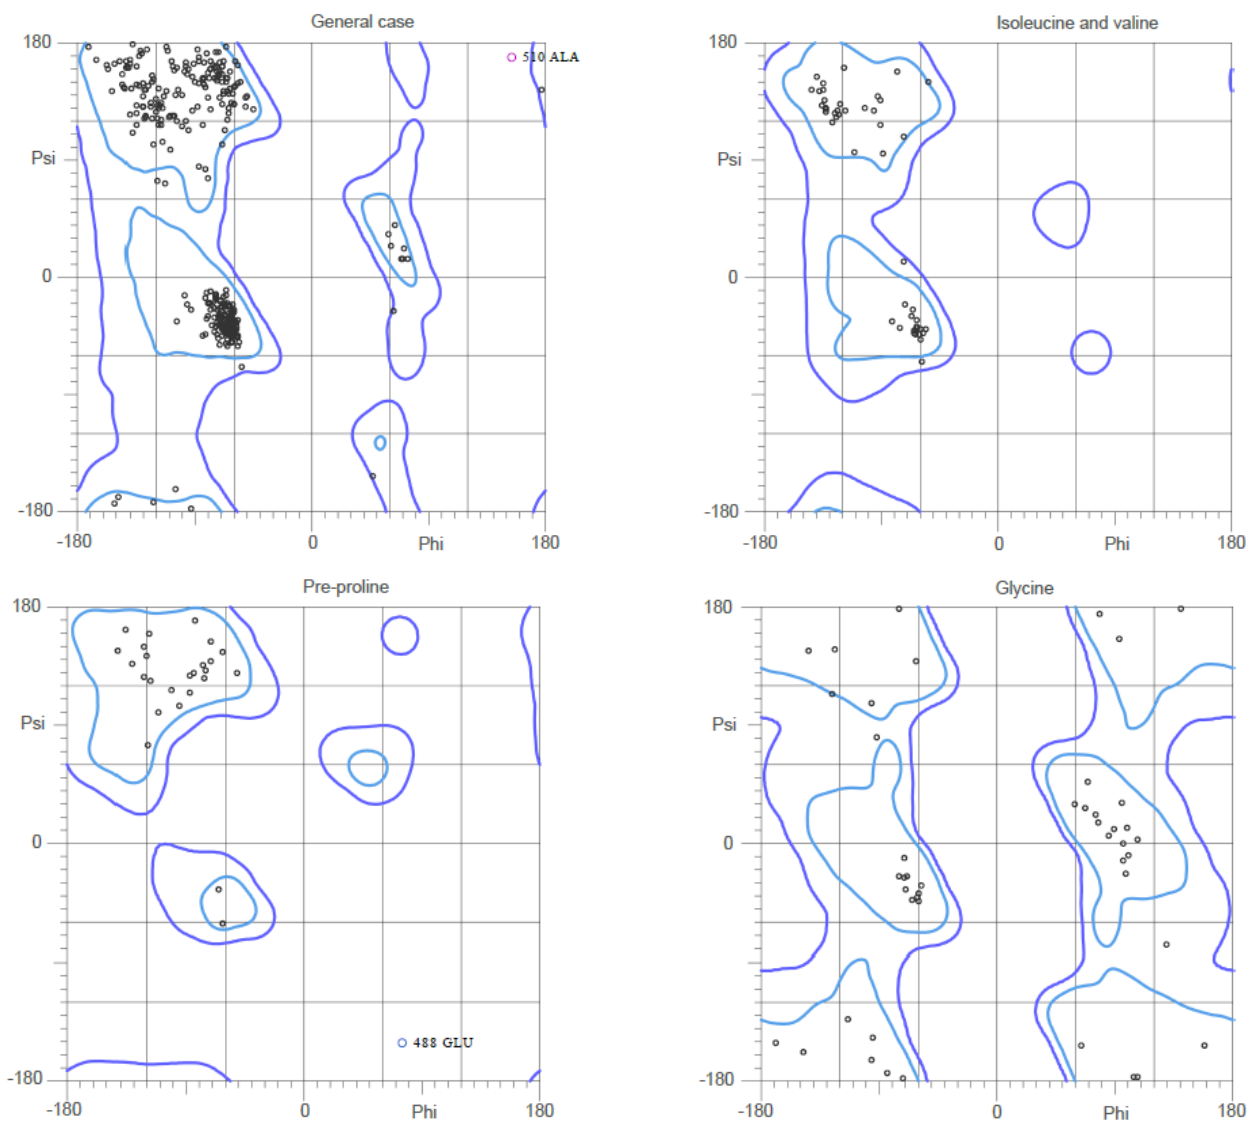

**Figure S3.** Ramachandran Plot of hIALP, (A) General; (B) Isoleucine & Valine; (C) Pre-Proline; (D) Glycine. 96.8% (509/526) of all residues are in favored (98%) regions. 99.4% (523/526) of all residues are in allowed (>99.8%) regions.

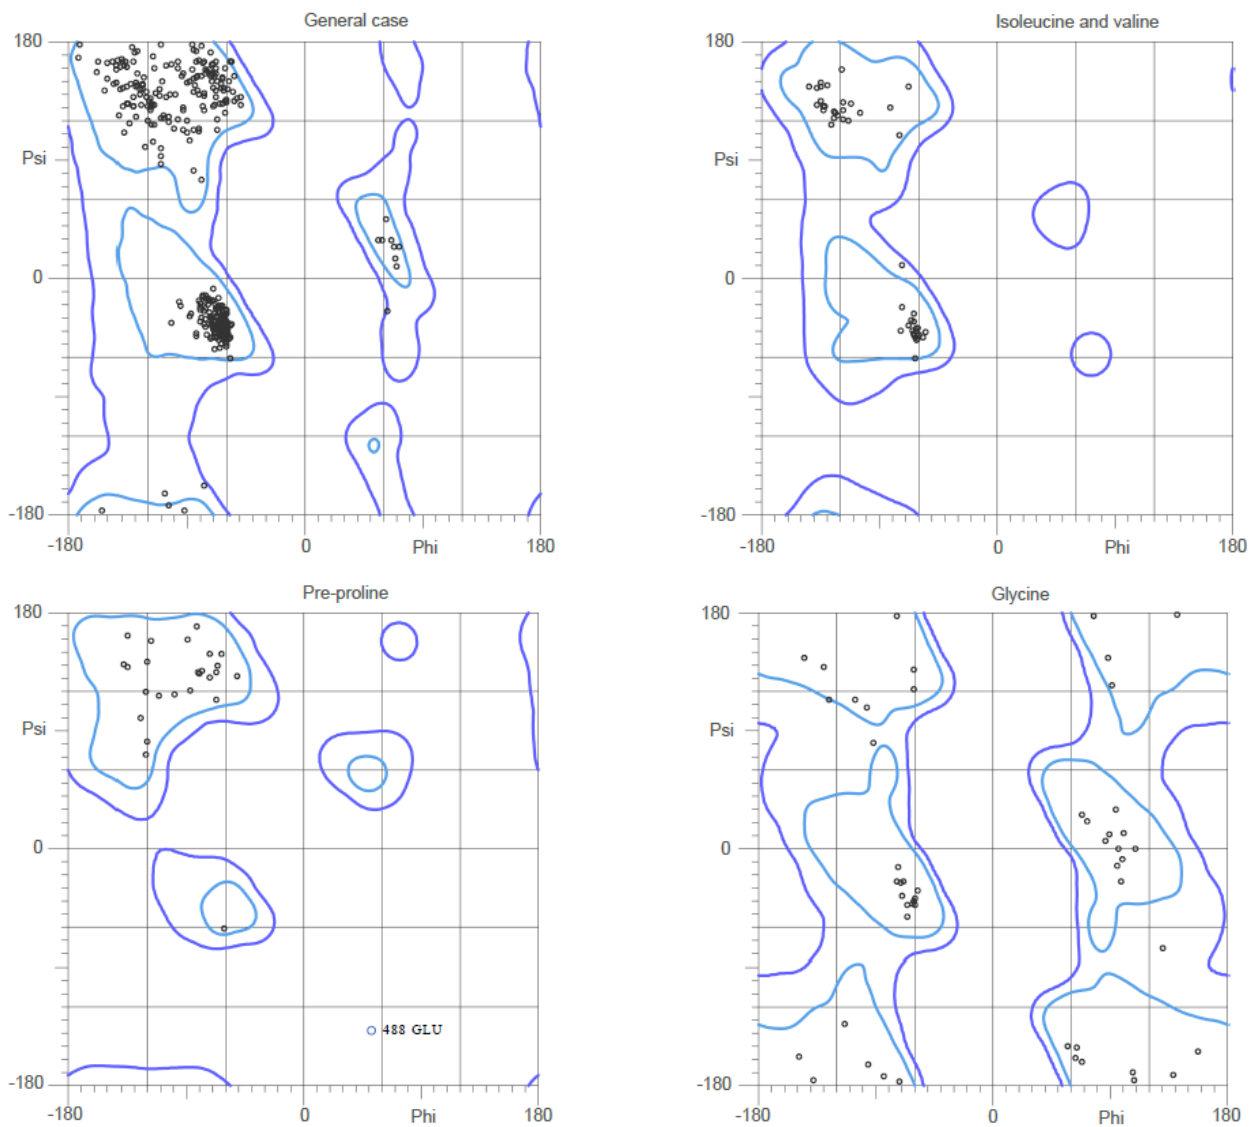

**Figure S4.** Ramachandran Plot of hGCALP, (A) General; (B) Isoleucine & Valine; (C) Pre-Proline; (D) Glycine. 97.9% (519/530) of all residues are in favored (98%) regions. 99.8% (529/530) of all residues are in allowed (>99.8%) regions.

|                    |     |                     |                     |                     |                     |                     |            |
|--------------------|-----|---------------------|---------------------|---------------------|---------------------|---------------------|------------|
| RMSD: ca           | 1   | 11                  | 21                  | 31                  | 41                  |                     |            |
| 4H2I, chain A      | 26  |                     |                     | MWE                 | LTILHTNDVH          | SRLEQTSEDS          |            |
| Q66HL0_RAT model 4 | 1   | MRPAAATAPK          | WLLLLALSALL         | PLWPTAK             | SWE                 | LTILHTNDVH          | SRLEQTSDDS |
| RMSD: ca           | 51  | 61                  | 71                  | 81                  | 91                  |                     |            |
| 4H2I, chain A      | 49  | SKCVDASRCM          | GGVARLFTKV          | QQIRRAEPNV          | LLLDAGDQYQ          | GTIWFTVYKG          |            |
| Q66HL0_RAT model 4 | 51  | TKCLNASLCV          | GGVARLFTKV          | QQIRKEEPNV          | LLLDAGDQYQ          | GTIWFTVYKG          |            |
| RMSD: ca           | 101 | 111                 | 121                 | 131                 | 141                 |                     |            |
| 4H2I, chain A      | 99  | A EVAHF MNAL        | RYDAMALGNH          | EFDNGVEGLI          | EPLLKEAKFP          | ILSANIKAKG          |            |
| Q66HL0_RAT model 4 | 101 | LEVAHF MNLL         | GYDAMALGNH          | EFDNGVEGLI          | DPLL RNVKFP         | ILSANIKARG          |            |
| RMSD: ca           | 151 | 161                 | 171                 | 181                 | 191                 |                     |            |
| 4H2I, chain A      | 149 | PLASQISGLY          | LPYKVLVPGD          | E VVGIVGYTS         | KETPFLSNPG          | TNLVFEDEIT          |            |
| Q66HL0_RAT model 4 | 151 | PLAPQISGLY          | LPYKVLVSGG          | E VVGIVGYTS         | KETPFLSNPG          | TNLVFEDEV T         |            |
| RMSD: ca           | 201 | 211                 | 221                 | 231                 | 241                 |                     |            |
| 4H2I, chain A      | 199 | ALQPEVDK LK         | TLNVNKI IAL         | GHS GFEMDKL         | IAQKVRGVDV          | VVGGHSNTFL          |            |
| Q66HL0_RAT model 4 | 201 | ALQPEVDK LK         | TLNVNKI IAL         | GHS GFEMDKL         | IAQKVRGVDV          | VVGGHTNTFL          |            |
| RMSD: ca           | 251 | 261                 | 271                 | 281                 | 291                 |                     |            |
| 4H2I, chain A      | 249 | Y TGNPPSKEV         | PAGKYPFIVT          | SDDGRKVPV V         | QAYAFGKYL G         | Y LKIEFDERG         |            |
| Q66HL0_RAT model 4 | 251 | Y TGNPPSKEV         | PAGKYPFIVT          | SDDGRKVPV V         | QAYAFGKYL G         | Y LKVEFDDK G        |            |
| RMSD: ca           | 301 | 311                 | 321                 | 331                 | 341                 |                     |            |
| 4H2I, chain A      | 299 | NVIVSSHGNPI         | LLDSSIPEDP          | S I KADIN KWR       | I KLD DYSTQE        | L GKTIVYLDG         |            |
| Q66HL0_RAT model 4 | 301 | NVVTSYGNPI          | LLNSTIR EDA         | A I KADIN QWR       | I KLD NYSTQE        | L GRTIVYLN G        |            |
| RMSD: ca           | 351 | 361                 | 371                 | 381                 | 391                 |                     |            |
| 4H2I, chain A      | 349 | SSQSCRFR EC         | NMGNLICDAM          | INNNLRH ADE         | MFWNHVSMCI          | LNGGGIRSPI          |            |
| Q66HL0_RAT model 4 | 351 | SAQE CRFR EC        | NMGNLICDAM          | INNNLRHPDE          | MFWNHVSMCI          | VNGGGIRSPI          |            |
| RMSD: ca           | 401 | 411                 | 421                 | 431                 | 441                 |                     |            |
| 4H2I, chain A      | 399 | DERNDGTITW          | ENLA AVL PFG        | GTFDLVQLKG          | STLKKAF EHS         | VHRYGQSTGE          |            |
| Q66HL0_RAT model 4 | 401 | DERNNGTITW          | ENLA AVL PFG        | GTFDLVQLKG          | STLKKAF EHS         | VHRYGQSTGE          |            |
| RMSD: ca           | 451 | 461                 | 471                 | 481                 | 491                 |                     |            |
| 4H2I, chain A      | 449 | FLQVGGI HVV         | Y DLSRKP GDR        | VVKLDV LCTK         | CRVPSYDPLK          | MDEVYK VILP         |            |
| Q66HL0_RAT model 4 | 451 | FLQVGGI HVV         | Y DLSRKP WDR        | VVQLKVLCTK          | CRVPIYEPL E         | MDKVYK VVLP         |            |
| RMSD: ca           | 501 | 511                 | 521                 | 531                 | 541                 |                     |            |
| 4H2I, chain A      | 499 | NFLANGGDGF          | QM I KDELLRH        | D S G D Q D I N V V | S T Y I S K M K V I | Y P A V E G R I K F |            |
| Q66HL0_RAT model 4 | 501 | S Y L V N G G D G F | Q M I K D E L L K H | D S G D Q D I S V V | S E Y I S K M K V I | Y P A V E G R I K F |            |
| RMSD: ca           | 551 | 561                 | 571                 | 581                 |                     |                     |            |
| 4H2I, chain A      | 549 | S L E H H H H H H   |                     |                     |                     |                     |            |
| Q66HL0_RAT model 4 | 551 | S . . . . . A       | A S H Y Q G S F P L | I I L S F W A V I L | V L Y Q             |                     |            |

**Figure S5.** Sequence alignment of target rat ecto-5'-Nucleotidase (re5NT) with the template protein human ecto-5'-Nucleotidase (he5NT).

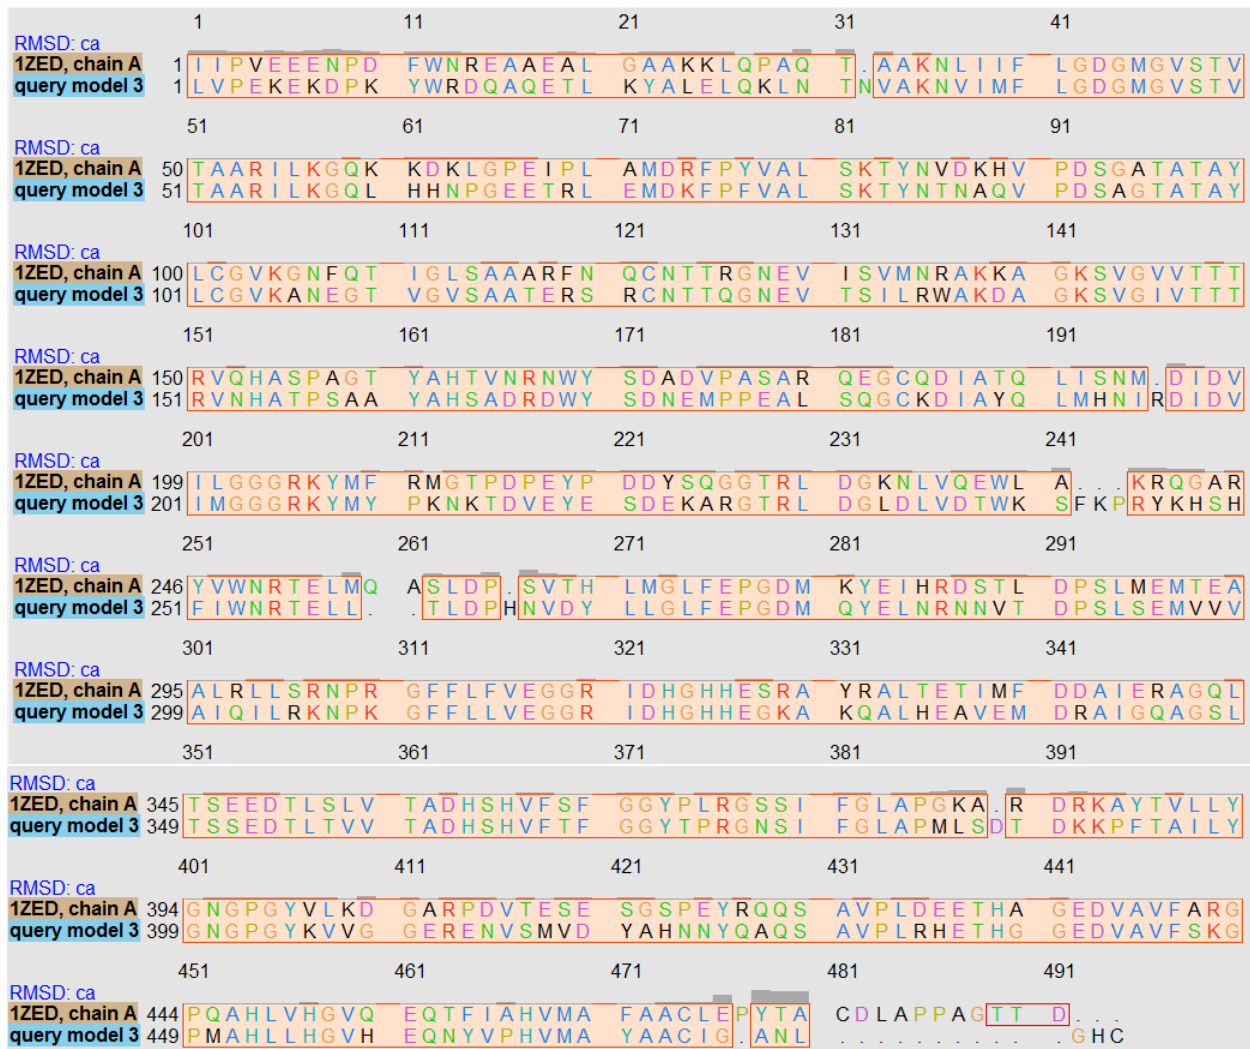

**Figure S6.** Sequence alignment of target human tissue non-specific alkaline phosphatase (hTNAP) with the template protein human placental alkaline phosphatase (hPALP).

|                    |     |     |     |     |     |
|--------------------|-----|-----|-----|-----|-----|
|                    | 1   | 11  | 21  | 31  | 41  |
| RMSD: ca           |     |     |     |     |     |
| 1ZED, chain A      | 1   |     | I   | I   | W   |
| PPBI_HUMAN model 1 | 1   |     | I   | W   | A   |
|                    | 51  | 61  | 71  | 81  | 91  |
| RMSD: ca           |     |     |     |     |     |
| 1ZED, chain A      | 32  | A   | A   | K   | D   |
| PPBI_HUMAN model 1 | 51  | A   | A   | K   | D   |
|                    | 101 | 111 | 121 | 131 | 141 |
| RMSD: ca           |     |     |     |     |     |
| 1ZED, chain A      | 82  | T   | G   | L   | N   |
| PPBI_HUMAN model 1 | 101 | T   | G   | L   | N   |
|                    | 151 | 161 | 171 | 181 | 191 |
| RMSD: ca           |     |     |     |     |     |
| 1ZED, chain A      | 132 | V   | Q   | H   | A   |
| PPBI_HUMAN model 1 | 151 | V   | Q   | H   | A   |
|                    | 201 | 211 | 221 | 231 | 241 |
| RMSD: ca           |     |     |     |     |     |
| 1ZED, chain A      | 182 | G   | C   | D   | I   |
| PPBI_HUMAN model 1 | 201 | G   | C   | D   | I   |
|                    | 251 | 261 | 271 | 281 | 291 |
| RMSD: ca           |     |     |     |     |     |
| 1ZED, chain A      | 232 | N   | L   | V   | Q   |
| PPBI_HUMAN model 1 | 251 | N   | L   | V   | Q   |
|                    | 301 | 311 | 321 | 331 | 341 |
| RMSD: ca           |     |     |     |     |     |
| 1ZED, chain A      | 282 | S   | T   | L   | D   |
| PPBI_HUMAN model 1 | 301 | S   | T   | L   | D   |
|                    | 351 | 361 | 371 | 381 | 391 |
| RMSD: ca           |     |     |     |     |     |
| 1ZED, chain A      | 332 | I   | M   | F   | D   |
| PPBI_HUMAN model 1 | 351 | I   | M   | F   | D   |
|                    | 401 | 411 | 421 | 431 | 441 |
| RMSD: ca           |     |     |     |     |     |
| 1ZED, chain A      | 382 | A   | R   | D   | R   |
| PPBI_HUMAN model 1 | 401 | A   | R   | D   | R   |
|                    | 451 | 461 | 471 | 481 | 491 |
| RMSD: ca           |     |     |     |     |     |
| 1ZED, chain A      | 432 | H   | A   | G   | E   |
| PPBI_HUMAN model 1 | 451 | H   | A   | G   | E   |
|                    | 501 | 511 | 521 | 531 |     |

**Figure S7.** Sequence alignment of target human intestinal alkaline phosphatase (hIALP) with the template protein human placental alkaline phosphatase (hPALP).



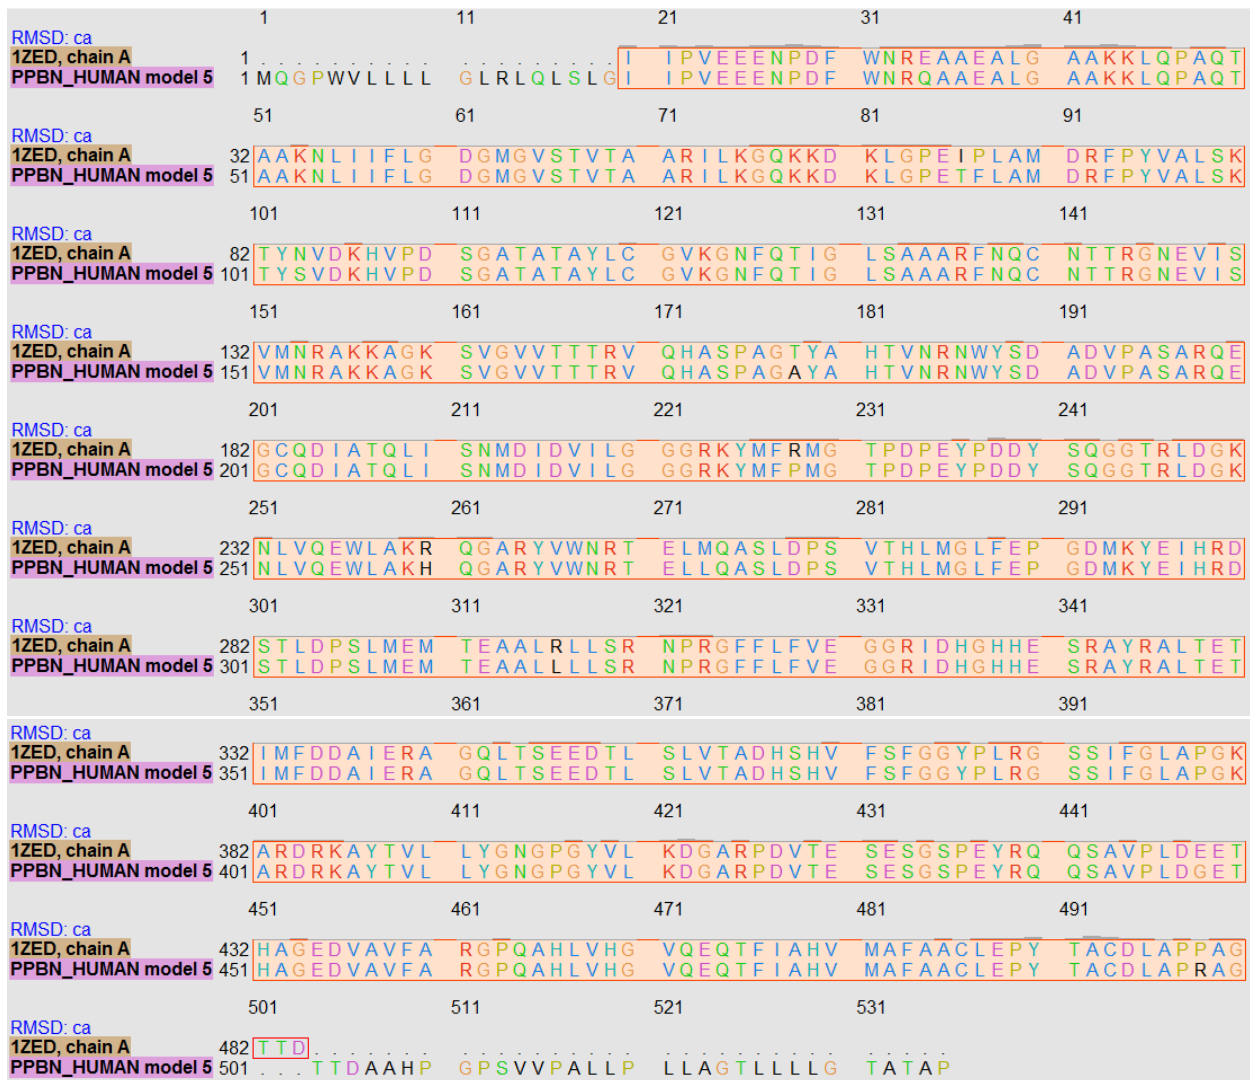

**Figure S8.** Sequence alignment of target human germ cell alkaline phosphatase (hGCAP) with the template protein human placental alkaline phosphatase (hPALP).

**Table S1.** Comparison of active site residues of hTNALP, hIALP and hGCALP with hPALP (PDB id: 1ZED). Conserved residues (with respect to hPALP) are in purple font color, the residues which are not conserved are in red font color.

| <b>hPALP</b> | <b>hTNALP</b> | <b>hIALP</b> | <b>hGCALP</b> |
|--------------|---------------|--------------|---------------|
| Asp42        | Asp43         | Asp61        | Asp61         |
| Asp91        | Asp92         | Asp110       | Asp110        |
| Ser92        | Ser93         | Ser111       | Ser111        |
| Phe107       | Glu108        | Phe126       | Phe126        |
| Gln108       | Gly109        | Gln127       | Gln127        |
| His153       | His154        | His172       | His172        |
| Ser155       | Thr156        | Ser174       | Ser174        |
| Arg166       | Arg167        | Arg185       | Arg185        |
| Glu311       | Glu315        | Glu330       | Glu330        |
| Asp316       | Asp320        | Asp335       | Asp335        |
| His320       | His324        | His339       | His339        |
| Asp357       | Asp361        | Asp376       | Asp376        |
| His358       | His362        | His377       | His377        |
| Glu429       | His434        | Ser448       | Gly448        |
| His432       | His437        | His451       | His451        |
